# Supplementary material for: Prognosis of hepatitis B virus reactivation in newly diagnosed multiple myeloma in modern era therapy: a retrospective study
Source: PeerJ journal article supplement (doi:10.7717/peerj.18475), 2024-11-01
Supplement: TableS1.docx [file TableS1.docx]

**Supplemental Table 1. Study population characteristics.**

| **Variables** |  |
| --- | --- |
| **Age, n (%)** |  |
| <65 years | 267（75%） |
| ≥65 years | 88（25%） |
| **Sex, n (%)** |  |
| Male | 223（63%） |
| Female | 132（37%） |
| **MM subtype, n (%)** |  |
| IgG | 212（60%） |
| IgA | 87（25%） |
| Light chain | 30（8%） |
| a Others | 26（7%） |
| **DS stage, n (%)** |  |
| I | 80（23%） |
| II | 87（24%） |
| III | 188（53%） |
| **ISS, n (%)** |  |
| 1 | 101（28%） |
| 2 | 78（22%） |
| 3 | 176（50%） |
| **R‑ISS, n (%)** |  |
| 1 | 97（27%） |
| 2 | 213（60%） |
| 3 | 45（13%） |
| **IMWG risk stratification, n (%)** |  |
| Low risk | 89（25%） |
| Moderate risk | 241（68%） |
| High risk | 25（7%） |
| **Number of Bone lesions, n (%)** |  |
| None | 83（23%） |
| 1 | 25（7%） |
| ≥2 | 247（70%） |
| **Plasma cells in bone marrow** |  |
| ＜10% | 160（%） |
| ≥10% | 195（%） |
| **EMD, n (%)** |  |
| No | 325（92%） |
| Yes | 30（8%） |
| **bUse of bortezomib, n (%)** | 248（70%） |
| **bUse of thalidomide, n (%)** | 99（28%） |
| **bUse of lenalidomide, n (%)** | 175（49%） |
| **bASCT, n (%)** | 62（17%） |
| **Baseline laboratory parameters, n (%)** |  |
| β2 _x005f‑microglobulin ≥3.5 mg/l | 230（65%） |
| Hemoglobin <100 g/l | 214（60%） |
| Platelets <100x109/l | 38（11%） |
| Albumin <35 g/l | 160（45%） |
| Alkaline phosphatase >185 IU/l | 9（3%） |
| Lactate dehydrogenase >245 IU/l | 55（15%） |
| Serum creatinine ≥177 µmol/l | 59（17%） |
| Serum calcium >2.65 mmol/l | 36（10%） |
| C‑reactive protein >5 mg/l | 140（39%） |
| **bHBV reactivation, n (%)** |  |
| No | 322（91%） |
| Yes | 33（9%） |
| **Died, n (%)** | 89（25%） |

aOthers include IgM, IgD, IgE and non-secretory myeloma. b Before the first progression. MM, multiple myeloma; Ig, immunoglobulin; DS, Durie-Salmon; ISS, International Staging System; R-ISS, Revised-International Staging System; IMWG, International Myeloma Working Group; EMD, extramedullary disease; HBV, hepatitis B virus; ASCT, autologous stem cell transplantation.
