# Supplementary material for: Prognosis of hepatitis B virus reactivation in newly diagnosed multiple myeloma in modern era therapy: a retrospective study
Source: PeerJ journal article supplement (doi:10.7717/peerj.18475), 2024-11-01
Supplement: TableS3.xlsx [file TableS3.xlsx]

## Sheet: Sheet1
Patient serial number	Sex	Age	Date of initial diagnosis	Multiple myeloma types	DS	ISS	RISS	IMWG	Whether to transplant before disease progression	Progress or not	PFS	Dead or not	OS	1q21	RB1	IGHMAF fusion	IGHFGFR3 fusion	P53-	D13S319	HBV reactivation	HBsAg	HBsAb	HBcAb	HBeAg	HBeAb	Bone marrow plasma cells%	Number of bone lesions	M protein	b2 microglobulin	IgG	IgA	IgM	C3	C4	WBC	NEU	NUE%	LYM	LYM%	HB	PLT	ALB	LDH	Cre	Ca2+	CRP
1	Male	52	2020-12-25	λ-light chain	2	1	1	low-risk	No	No	15	Yes	15	normal	normal	-	normal	normal	normal	Yes	+	-	+	-	+	0	Multiple	5	＜3.5	3.09	0.08	0.91	1.01	0.269	6.19	4.13	66.7	1.19	19.2	117	180	39.7	196	54.2	2.1	3.93
2	Female	56	2018-12-11	Nonsecretory type	3	1	1	low-risk	No	Yes	31	No	48	normal	normal	-	normal	normal	normal	Yes	+	-	+	-	+	0	Multiple	0	≥3.5	7.45	0.539	0.803	1.11	0.398	4.15	2.46	59.4	1.15	27.7	75	409	38.5	153.7	48.4	2.23	3.91
3	Female	58	2018-05-23	IgA-λ	3	1	1	low-risk	No	Yes	52	Yes	52	normal	normal	-	normal	normal	normal	Yes	+	-	+	+	-	4	Multiple	10.37	＜3.5	9.65	11.1	0.694	1.49	0.213	8.4	5.6	66.3	1.9	23	114	299	35.6	191.3	72.5	2.18	33.56
4	Male	67	2019-09-20	IgA-κ	2	3	2	standard risk	No	No	39	No	39	abnormal	normal	-	normal	normal	normal	Yes	+	-	+	-	+	8	Multiple	40	≥3.5	3.14	53.1	0.149	0.981	0.265	5.08	3.12	61.4	1.33	26.2	102	211	29.8	153	82.1	2.35	55
5	Male	58	2017-08-09	IgG-k	3	3	3	high-risk	No	No	12	Yes	12	abnormal	normal	-	normal	Trisomy	normal	Yes	+	-	+	-	+	71	Multiple	100.6	≥3.5	110	＜0.245	＜0.156	0.423	0.047	7.32	2.8	38.8	3.5	48.2	74	50	25.1	637	208.9	2.95	1.01
6	Female	55	2016-01-26	IgG-λ	3	3	2	standard risk	No	No	83	No	83	abnormal	normal	-	normal	normal	normal	Yes	+	-	+	-	+	36	0	96.3	≥3.5	113	0.351	0.443	0.389	0.021	4.56	1.5	31.9	2.4	12.1	79	146	20.8	93.3	76.1	1.51	3.15
7	Male	52	2015-02-09	λ-light chain	1	1	1	low-risk	No	Yes	5	No	94	abnormal	normal	-	normal	normal	normal	Yes	+	-	+	-	+	9	Multiple	8.27	≥3.5	2.14	＜0.245	＜0.156	0.968	0.434	7.73	2.6	34	4.1	53.4	66	125	33.7	402.4	89.8	2.2	2.1
8	Male	70	2020-06-12	IgG-κ	2	2	2	standard risk	No	No	30	No	30	normal	normal	-	normal	normal	normal	Yes	+	-	+	-	+	0	Multiple	21	≥3.5	34.5	＜.067	0.116	1.04	0.242	4.92	3.27	66.5	1.32	26.8	88	242	40.9	170.8	80.9	2.33	0.85
9	Female	58	2020-04-26	Nonsecretory type	1	1	2	standard risk	No	No	27	Yes	27	normal	normal	-	normal	normal	normal	Yes	+	-	+	-	+	20.5	Multiple	0	≥3.5	7.05	1.84	0.363	1.03	0.513	6.25	3.74	59.8	2.01	32.2	125	263	41.3	142.8	57	2.71	5.3
10	Female	63	2020-05-20	IgG-κ	1	1	1	standard risk	No	Yes	5	Yes	5	normal	normal	-	normal	normal	normal	Yes	+	-	+	-	+	0	Multiple	7	≥3.5	16.7	＜.067	0.887	0.965	0.223	6.68	4.47	66.9	1.5	22.5	125	278	38.2	210.8	58.1	2.05	1.26
11	Male	63	2019-06-24	IgA-κ	3	3	2	standard risk	No	Yes	6	No	42	abnormal	normal	-	normal	normal	normal	Yes	+	-	+	-	+	50	0	70	≥3.5	3.51	82.5	0.11	0.36	0.138	4.01	2.21	55.2	1.42	35.4	75	57	26.5	173.2	82.3	2.3	0.84
12	Male	44	2019-08-30	IgA-λ	1	2	2	low-risk	Yes	Yes	33	No	40	normal	normal	-	normal	normal	normal	Yes	+	-	+	-	+	0	Multiple	32	≥3.5	5.29	44.5	0.313	0.876	0.226	4.85	2.46	50.8	1.83	37.7	120	210	34.8	102.4	54.8	2.37	4.05
13	Male	65	2019-10-31	IgA-κ	2	2	1	standard risk	No	Yes	7	Yes	7	normal	normal	-	normal	normal	normal	Yes	+	-	+	-	+	16	Multiple	35	≥3.5	5.2	35.6	0.256	1.01	0.285	5.5	3.12	56.7	1.92	34.9	89	185	32.4	164.9	63.3	2.36	16.62
14	Female	46	2016-01-29	IgA-k	3	3	2	standard risk	No	Yes	0	No	83	normal	normal	-	abnormal	normal	normal	Yes	+	-	+	-	-	40.5	Multiple	65	≥3.5	3.51	79.5	＜0.156	0.904	0.13	6.76	4.2	61.9	2.2	32.8	84	169	24.7	274.8	68.3	2.38	35.12
15	Male	48	2019-08-06	IgG-κ	2	3	2	standard risk	Yes	No	35	Yes	35	abnormal	normal	-	normal	normal	normal	Yes	+	-	+	-	+	14.5	Multiple	62	＜3.5	73.5	0.138	0.246	0.609	0.043	5.38	2.84	52.7	2.01	37.4	113	146	30.7	106.9	75	2.3	1.15
16	Male	57	2019-02-19	κ-light chain	3	3	2	standard risk	Yes	Yes	38	No	46	normal	deletion	-	normal	normal	normal	Yes	+	-	+	-	+	26.5	Multiple	1	≥3.5	8.23	0.787	0.276	1.35	0.491	5.31	3.59	67.7	1.25	23.5	134	111	37.4	130.8	141.8	3.33	1.73
17	Male	25	2017-11-14	IgA-λ	1	1	1	low-risk	No	Yes	2	No	61	normal	normal	-	normal	normal	normal	Yes	+	-	+	-	+	0	Multiple	3.14	＜3.5	8.52	6.47	0.341	0.752	0.162	5.99	3.8	64.2	1.7	27.7	140	295	41	102	85.9	2.15	0.51
18	Female	59	2015-03-27	λ-light chain	3	3	3	standard risk	No	Yes	34	Yes	34	normal	normal	-	normal	normal	normal	Yes	+	-	+	-	+	54	1	2.31	≥3.5	1.73	＜0.245	＜0.156	0.711	0.298	6.42	4.3	67.1	1.5	23.5	80	240	35.2	287	409.8	2.92	0.41
19	Female	24	2016-10-08	Nonsecretory type	1	1	1	low-risk	No	Yes	7	No	74	normal	normal	-	normal	normal	normal	Yes	+	-	+	+	-	0	Multiple	0	≥3.5	17.1	3.11	1.51	1.14	0.193	8.53	5.2	61.1	2.6	30.8	125	322	42.2	301.1	42.9	2.27	12.67
20	Male	52	2017-08-31	IgG-κ	3	2	1	low-risk	No	No	64	No	64	normal	normal	-	normal	normal	normal	Yes	+	-	+	-	+	15	Multiple	84.04	＜3.5	108	0.301	0.309	0.919	0.035	12.13	6.6	54.2	3.9	32	95	220	35.6	151.3	92.3	2.34	16.71
21	Male	63	2019-09-06	IgG-κ	2	2	1	standard risk	Yes	No	36	Yes	36	normal	normal	-	normal	normal	normal	Yes	-	-	+	-	-	0	0	34	＜3.5	35	0.086	0.141	1.11	0.059	4.11	1.19	29	2.38	57.9	115	175	39.9	229.4	83.5	2.06	0.09
22	Female	56	2018-05-14	IgG-κ；IgA-k	3	2	1	low-risk	No	No	48	Yes	48	normal	normal	-	normal	normal	normal	Yes	+	-	+	-	+	29	Multiple	54.13	≥3.5	50.6	14.7	＜0.156	0.894	0.173	7.22	5	69.4	1.3	21.2	127	247	27	108.1	44.3	2	6.54
23	Male	75	2017-07-01	Nonsecretory type	3	3	2	standard risk	No	Yes	36	Yes	36	abnormal	normal	-	normal	normal	normal	Yes	-	-	+	-	-	7	Multiple	0	＜3.5	9.92	0.687	0.438	1.4	0.451	5.44	3.5	63.6	1.3	0.25	91	384	34.7	265.6	148.8	2.09	3.25
24	Male	46	2015-07-20	IgG-k	2	2	2	low-risk	No	Yes	6	Yes	6	normal	normal	-	normal	normal	normal	Yes	+	-	+	-	+	1	Multiple	17.37	≥3.5	23.3	1.76	0.676	0.994	0.113	5.74	3.8	66.2	1.3	22.4	138	209	43.8	161.1	90	2.19	9.15
25	Female	55	2019-11-28	IgA-κ	3	2	1	low-risk	No	Yes	25	Yes	25	normal	normal	-	normal	normal	normal	Yes	+	-	+	-	+	0	Multiple	17	≥3.5	2.65	70.6	0.108	0.515	0.158	5.21	2.15	41.2	2.52	48.4	78	110	29.7	112.5	55.9	2.21	2.22
26	Female	56	2019-08-30	κ-light chain	1	1	1	standard risk	No	No	40	No	40	normal	normal	-	normal	normal	normal	Yes	+	-	+	-	+	0	Multiple	0	＜3.5	20.4	3.52	2.57	0.986	0.241	6.81	4.34	63.8	2.06	30.2	132	239	44.9	132.4	54.9	2.43	0.34
27	Male	28	2018-08-21	IgG-κ	3	3	2	low-risk	Yes	Yes	49	No	52	normal	normal	-	normal	normal	normal	Yes	+	-	+	+	-	47	Multiple	90	≥3.5	21.6	4.5	3.54	1.912	1.212	9.68	4.91	50.8	4.05	41.8	55	129	28.4	219.2	111.4	2.23	17.17
28	Male	64	2018-03-02	κ-light chain	3	1	2	standard risk	No	Yes	20	No	57	normal	normal	-	normal	normal	normal	Yes	-	+	+	-	+	40	Multiple	4.09	≥3.5	3.36	＜0.245	＜0.156	1.13	0.303	3.69	2.1	57.2	1.3	36.3	135	203	46.1	147.6	50.3	2.3	0.74
29	Male	45	2015-03-20	IgG-k	3	3	2	standard risk	No	Yes	35	No	93	abnormal	normal	-	normal	normal	normal	Yes	+	-	+	-	+	43	1	48.55	≥3.5	60.9	＜0.245	＜0.156	0.669	0.118	3.24	1.3	38.6	1.3	38.6	93	169	33.3	224.8	79.2	1.81	1.37
30	Male	55	2017-12-19	λ-light chain	1	3	2	standard risk	No	Yes	33	No	60	normal	normal	-	normal	normal	normal	Yes	+	-	-	-	-	0	Multiple	1.91	≥3.5	10.8	7.81	0.681	0.653	0.611	4.86	2.9	59.7	1.4	29.2	143	269	37.9	132.9	97.5	2.08	1.95
31	Male	47	2017-12-07	IgA-κ	3	3	2	standard risk	Yes	Yes	18	No	60	normal	normal	-	normal	normal	normal	Yes	-	-	-	-	-	12	Multiple	42.23	＜3.5	2.78	48.4	＜0.156	0.8	0.219	6.69	2.9	41.5	3.3	48	79	35	30.7	168.1	417.9	3.4	1.54
32	Male	65	2020-05-01	IgA-κ	2	1	2	standard risk	No	No	28	Yes	28	abnormal	normal	-	normal	normal	normal	Yes	-	+	-	-	-		Multiple	13	＜3.5	11.7	16.6	0.863	1.22	0.364	8.87	6.3	71.1	1.84	20.7	108	650	38.9	442.8	42.1	2.34	91.31
33	Male	68	2019-12-05	λ-light chain	3	1	2	standard risk	No	Yes	34	No	36	normal	normal	-	normal	normal	normal	Yes	-	+	-	-	-	0	Multiple	1	＜3.5	4.9	0.131	0.087	1.01	0.352	4.45	3.4	74.9	0.54	11.9	54	96	45.5	445.6	67.2	2.35	1.19
34	Female	74	2016-02-03	IgG-k	3	3	2	high-risk	No	No	20	Yes	20	abnormal	normal	-	normal	deletion	normal	No	+	-	+	-	-	48	Multiple	56.05	≥3.5	89	＜0.245	＜0.156	0.871	0.128	4.67	1.1	24.2	3.1	66.8	72	130	35.1	196.5	98.2	2.23	2.52
35	Male	57	2016-02-22	IgA-k	3	3	2	standard risk	No	No	82	No	82	abnormal	normal	-	normal	normal	normal	No	+	-	+	-	+	14.5	Multiple	54.94	≥3.5	1.61	74.8	＜0.156	0.485	0.082	4.01	2.7	66.1	1.2	29.2	53	161	25.1	123.8	126.1	2.16	2.22
36	Female	68	2017-07-24	IgA-K	1	2	1	standard risk	No	No	65	No	65	normal	normal	-	normal	normal	normal	No	+	-	+	-	+	8	0	58.05	＜3.5	2.25	57.5	＜0.156	0.598	0.217	3.41	2.2	64.8	0.7	21.7	93	134	26.4	175.3	42.7	1.72	4.91
37	Male	83	2014-05-06	IgA-λ	3	3	3	standard risk	No	Yes	7	Yes	7	normal	normal	-	normal	normal	normal	No	+	-	+	-	+	18.5	Multiple	32.35	≥3.5	4.42	48.2	0.234	0.789	0.599	7.3	4.1	55.7	2.6	35.2	100	240	36.4	140.3	97.4	2.6	1.48
38	Male	37	2018-02-11	IgA-κ	3	2	2	standard risk	Yes	No	31	Yes	31	normal	normal	-	normal	normal	normal	No	+	-	+	-	+	5.5	0	57.7	≥3.5	4.3	58.8	0.219	0.109	0.309	11.87	7.7	64.7	3	25.4	83	253	31.5	374.6	86.9	2.44	4.84
39	Male	53	2017-12-28	IgA-κ	3	3	2	standard risk	No	No	60	No	60	normal	normal	-	normal	normal	normal	No	+	-	+	-	+	51	0	58.38	≥3.5	4.43	42.2	＜0.156	0.469	0.14	4.55	2.5	55.9	1.3	27.7	65	180	21.6	77.1	62.2	1.95	41
40	Male	69	2020-11-09	IgG- λ	2	1	2	standard risk	No	No	25	No	25	normal	normal	-	normal	normal	normal	No	+	-	+	-	+	0	Multiple	20	＜3.5	5.19	0.929	0.584	1.39	0.298	7.67	5.56	72.5	1.67	21.8	106	196	40	340	55.8	2.32	10.82
41	Male	56	2020-11-16	IgA-κ	1	1	1	standard risk	No	No	25	No	25	normal	normal	-	normal	normal	normal	No	+	-	+	-	+	0	Multiple	22	≥3.5	4.84	39.5	0.149	0.901	0.18	6.25	3.08	49.2	2.45	39.2	130	186	41.3	109.3	61.5	2.33	0.51
42	Female	51	2020-10-25	κ-light chain	1	3	2	low-risk	No	No	26	No	26	normal	normal	-	normal	normal	normal	No	+	-	+	-	+	14.5	Multiple	0	＜3.5	7.86	0.769	0.706	1.2	0.573	3.7	2.23	60.2	1.51	31.1	126	188	45.8	180.4	61.2	2.6	0.6
43	Female	57	2019-04-30	IgG- λ	3	3	2	standard risk	No	No	44	No	44	normal	normal	-	normal	normal	normal	No	+	-	+	-	+	18.5	Multiple	34	≥3.5	5.75	27.8	0.274	0.755	0.241	3.55	2.58	72.7	0.76	21.4	23	76	29.7	177.3	416.9	3.19	16.52
44	Female	57	2017-03-15	IgG-λ	3	3	3	standard risk	No	No	18	Yes	18	normal	deletion	-	normal	normal	abnormal	No	+	-	+	-	+	68	Multiple	39.69	＜3.5	4.96	0.401	0.128	0.709	0.305	7.62	6.2	80.7	0.8	10.5	78	188	30.2	575.5	59.6	1.6	1.5
45	Male	56	2019-07-16	IgA-κ	3	3	2	standard risk	Yes	No	37	Yes	37	normal	normal	-	normal	normal	normal	No	+	-	+	-	+	4	0	29	≥3.5	5.75	27.8	0.274	0.755	0.241	6.97	3.77	54.1	2.33	33.4	83	129	26.2	114.7	193	2.1	47.1
46	Male	53	2019-02-11	κ-light chain	1	2	1	low-risk	No	No	46	No	46	normal	normal	-	normal	normal	normal	No	+	-	+	-	+	1	Multiple	0	＜3.5	4.96	0.401	0.128	0.709	0.305	6.89	3.04	44.2	3.15	45.7	123	184	41.6	118.7	83.5	2.33	0.22
47	Male	41	2016-05-17	IgG-k	2	1	2	low-risk	No	Yes	2	Yes	2	normal	normal	-	normal	normal	normal	No	+	-	+	-	-	0	Multiple	14.01	＜3.5	21	2.65	0.663	1.56	0.526	9.03	6.6	73.3	1.4	15.8	154	272	40.1	204	85.6	2.18	17.82
48	Female	57	2015-07-07	IgG-k	3	2	2	standard risk	No	Yes	16	No	89	normal	normal	-	normal	normal	normal	No	+	-	+	+	+	15	Multiple	56.1	＜3.5	76.2	＜0.245	0.444	0.735	0.129	6.53	3.3	50.7	2.7	40.7	94	222	41.2	216.3	44.3	2.13	0.42
49	Female	63	2020-10-11	IgG-κ	2	3	2	standard risk	No	Yes	5	Yes	5	normal	normal	-	normal	normal	normal	No	+	-	+	-	+	17.5	Multiple	43	≥3.5	64.1	0.849	0.633	1.4	0.87	7.63	5.46	71.5	1.8	23.6	101	286	34.4	135	58.8	2.04	3.73
50	Male	61	2015-03-12	IgG-k+λ	1	3	2	standard risk	No	No	93	No	93	normal	normal	-	normal	normal	normal	No	+	-	+	-	+	12.5	1	0	≥3.5	50.7	1.3	2.08	0.577	0.171	4.36	1.6	36.4	2	44.8	150	162	42	158	84.6	2.23	0.37
51	Male	68	2019-11-11	IgG- λ	1	1	1	standard risk	No	No	2	Yes	2	normal	normal	-	normal	normal	normal	No	+	-	+	+	-	0	1	15	≥3.5	26.8	1.61	0.824	0.674	0.154	5.3	2.7	51.4	1.9	35.7	129	168	41.6	148.5	54.6	2.89	19.33
52	Male	52	2020-05-09	IgG-κ	3	1	1	low-risk	No	No	31	No	31	normal	normal	-	normal	normal	normal	No	+	-	+	-	+	0	Multiple	18	≥3.5	8.78	1.4	0.531	0.626	0.181	7.05	3.89	55.1	2.51	2.51	36	190	36.2	100.4	83.4	2.11	0.39
53	Female	66	2020-08-14	IgA-λ	3	2	2	standard risk	No	No	28	No	28	normal	normal	-	normal	normal	normal	No	+	-	+	+	-	31	Multiple	29	＜3.5	5.38	33.2	0.339	0.83	0.268	9.26	6.31	68.1	2.1	22.7	110	182	30.9	119.2	46.7	2.18	3.28
54	Male	40	2019-01-29	IgG-κ	2	2	3	high-risk	No	Yes	22	Yes	22	normal	deletion	+	abnormal	deletion	deletion	No	+	-	+	-	+	54.5	Multiple	68	≥3.5	87.5	0.4	0.283	0.585	0.067	4.28	1.4	32.7	2.53	59.1	111	254	28.2	101.5	87.2	2	1.89
55	Male	52	2015-07-24	IgG-λ	3	3	2	standard risk	No	Yes	12	No	89	normal	normal	-	normal	normal	normal	No	-	-	+	-	+	4	Multiple	84.43	≥3.5	95.5	＜0.245	＜0.156	0.424	＜0.017	3.29	1.6	49.3	1.4	43.1	65	77	20.7	86.4	126.4	2.1	0.48
56	Male	50	2018-06-12	κ-light chain	2	3	2	standard risk	No	No	54	No	54	normal	deletion	-	normal	normal	normal	No	-	-	+	-	-	16.5	Multiple	0	≥3.5	36.5	＜0.246	＜0.157	1.424	＜0.018	6.3	3.7	59.4	2	31.7	86	272	39.5	199	133.4	2.71	1.73
57	Female	62	2015-01-08	IgA-k	3	2	2	standard risk	No	Yes	53	No	95	normal	normal	-	normal	normal	normal	No	-	+	+	-	+	7	Multiple	14.49	≥3.5	8.05	14	0.233	0.934	0.279	2.57	1	38.4	1.1	43.6	106	564	39.3	121.8	56.1	2.09	1.97
58	Male	47	2019-02-20	κ-light chain	3	3	3	high-risk	No	No	10	Yes	10	normal	deletion	+	abnormal	normal	deletion	No	-	-	+	-	-	19	Multiple	1	≥3.5	3.25	0.138	0.06	0.807	0.3	10.56	2.77	26.2	6.46	61.2	70	103	49	349.6	131	2.57	0.2
59	Female	67	2017-05-22	IgA-K	3	3	2	standard risk	No	No	67	No	67	normal	normal	-	normal	normal	normal	No	-	+	+	-	+	41.5	0	59.76	＜3.5	4.67	62.9	＜0.156	0.547	0.58	4.67	2.8	60.4	1.3	28.3	43	252	29.4	177.3	133	2.29	2.92
60	Female	66	2015-04-23	IgG-k	3	3	2	standard risk	No	No	92	No	92	normal	normal	-	normal	normal	normal	No	-	-	+	-	+	69	0	80.32	≥3.5	101	＜0.245	＜0.156	0.679	0.06	5.87	2.1	35.6	2.7	45.6	78	241	17.9	189.3	216.6	2.72	1.06
61	Male	60	2015-11-02	IgG-k	2	2	2	standard risk	No	No	85	No	85	abnormal	normal	-	normal	normal	normal	No	-	+	+	-	-	7.5	0	34.47	＜3.5	43.5	＜0.245	0.222	0.682	0.069	5.36	2.1	39.9	2.1	18.5	69	209	32.5	187.6	163.1	2.13	1.22
62	Male	61	2015-03-24	IgG-λ	2	3	2		Yes	No	93	No	93	normal	normal	-	normal	normal	normal	No	-	+	+	-	+	0	Multiple	12.03	≥3.5	12	5.79	0.77	1.05	0.279	6.65	4.5	68.2	1.3	20	137	263	40.4	149.4	73.8	2.45	2.5
63	Female	49	2020-04-20	Nonsecretory type	1	1	1	low-risk	Yes	No	32	No	32	normal	normal	-	normal	normal	normal	No	-	+	+	-	-	5	Multiple	0	≥3.5	13	0.65	0.388	0.818	0.146	3.56	1.71	48	1.5	42.1	133	310	45.6	153.6	52.9	2.23	0.42
64	Male	50	2015-08-30	κ-light chain	1	1	1	low-risk	No	Yes	34	No	88	normal	normal	-	normal	normal	normal	No	-	+	+	-	-	7	Multiple	0	≥3.5	5.02	0.336	0.35	0.961	0.264	7.12	4.1	56.8	2.1	29.8	151	262	39.9	124.1	78.6	2.41	1.11
65	Male	64	2015-07-22	IgA-k	3	3	2	standard risk	No	Yes	29	No	89	normal	normal	-	normal	normal	normal	No	-	+	+	-	-	80	Multiple	85.69	≥3.5	2.02	77.4	＜0.156	0.293	0.08	3.7	1.7	44.5	1.3	35.8	71	71	23.8	75	86	2.25	0.35
66	Male	52	2017-04-06	IgA-k	3	2	3	standard risk	No	Yes	17	No	68	normal	normal	-	normal	normal	normal	No	-	-	+	-	+	26	Multiple	12.22	≥3.5	6.49	2.6	0.294	1.74	0.571	16.13	13.7	84.9	1.1	6.9	110	275	42.4	259.6	93.5	2.54	155.13
67	Male	45	2015-06-09	IgA-λ	1	2	2	low-risk	No	Yes	11	No	90	normal	normal	-	normal	normal	normal	No	-	+	+	-	-	20.5	1	55.11	≥3.5	6.35	69.7	0.166	0.344	0.179	4.86	2.8	57	1.8	36	90	159	29.3	54.2	61.7	2.23	7.63
68	Male	62	2017-09-09	IgG- λ	3	1	1	standard risk	No	Yes	57	No	63	normal	normal	-	normal	normal	normal	No	-	+	+	-	-	0	Multiple	18.68	≥3.5	23.2	2.11	0.533	0.964	0.129	5.58	3.4	60.2	1.8	31.5	125	261	32.5	115.4	90.3	2.31	2.43
69	Female	48	2016-05-05	IgG-k	3	3	2	high-risk	No	Yes	21	Yes	21	normal	deletion	-	normal	deletion	deletion	No	-	+	+	-	-	70	Multiple	27.27	＜3.5	42	0.795	0.224	1.54	0.475	14.12	10.3	72.8	2.7	19.3	112	186	36.7	154.5	306.5	3.51	150.67
70	Male	60	2016-03-01	Nonsecretory type	3	2	2	standard risk	No	Yes	23	No	81	abnormal	normal	-	normal	normal	normal	No	-	-	+	-	-	25.5	Multiple	0	≥3.5	3.92	＜0.245	＜0.156	1.28	0.256	4.86	3.7	77	0.8	17.3	145	195	47.4	223.4	72.4	2.31	11.77
71	Female	58	2017-05-04	IgG-k	1	3	2	high-risk	No	Yes	23	Yes	23	abnormal	deletion	-	abnormal	normal	deletion	No	-	+	+	-	+	35	0	48.63	≥3.5	56.6	0.568	1.06	1.16	0.155	4.86	2.2	45.4	2	40.9	102	1818	31.5	209	96.02	2.06	1.75
72	Female	55	2015-12-07	IgD-k	1	1	1	low-risk	No	No	84	No	84	normal	normal	-	normal	normal	normal	No	-	+	+	-	-	10.5	Multiple	0	＜3.5	7.94	0.25	＜0.156	1.19	0.306	5.58	3.1	55.6	1.8	32.4	132	310	45.9	164.3	48.6	2.41	6.13
73	Female	47	2015-10-28	IgA-λ	2	2	2	standard risk	No	Yes	28	No	86	normal	normal	-	normal	normal	normal	No	-	-	+	-	-	50	0	5075	＜3.5	3.09	37.8	＜0.156	0.665	0.627	4.02	1	23.6	2.7	67.2	63	141	32.7	101.6	55.2	2.21	0.3
74	Female	58	2017-01-18	IgG-λ	3	2	2	standard risk	No	Yes	61	Yes	61	normal	normal	-	normal	normal	normal	No	-	+	+	-	-	7	0	45.8	≥3.5	53.2	0.659	＜0.156	1.13	0.367	6.51	3.7	56.5	2.5	38.6	71	423	26.2	98.7	68.7	2.12	97.63
75	Male	67	2015-06-29	IgD-λ	3	2	3	standard risk	No	Yes	29	No	90	abnormal	normal	-	normal	normal	normal	No	-	+	+	-	+	16.5	＞2	23.89	＜3.5	4.52	0.55	＜0.156	0.408	1.24	6.73	4.1	60.3	1.8	26	120	283	39.6	349.4	98	2.44	21.58
76	Female	63	2017-04-01	κ-light chain	3	3	3	standard risk	No	No	68	No	68	abnormal	deletion	-	normal	normal	deletion	No	-	+	+	-	-	8	Multiple	0	＜3.5	4.1	＜0.245	＜0.156	1.48	0.272	3.51	1.7	48.4	1.6	44.2	104	128	44.2	345	57.4	2.24	0.9
77	Male	54	2016-10-28	IgG-k	1	1	1	low-risk	No	No	74	No	74	normal	normal	-	normal	normal	normal	No	-	-	+	-	-	0	0	6.66	＜3.5	10.3	2.23	1.21	1.17	0.247	7.14	5	67.8	1.7	22.5	141	334	42.7	230.9	53.1	2.22	8.95
78	Female	64	2015-01-28	λ-light chain	1	1	1	low-risk	No	No	95	No	95	normal	normal	-	normal	normal	normal	No	-	+	+	-	-	0	Multiple	0	＜3.5	17.2	2.12	1.19	1.12	0.4	6.75	3.6	53.7	2.4	35	137	313	45	207.4	64.3	2.26	0.58
79	Male	69	2016-11-09	IgG-k	3	3	2	standard risk	No	No	73	No	73	normal	normal	-	normal	normal	normal	No	-	+	+	-	+	5.5	Multiple	62.01	＜3.5	77.6	＜0.245	＜0.156	0.279	0.193	3.86	1.5	38.1	1.8	47.7	69	140	26.1	331.3	86	1.63	12.46
80	Male	63	2015-05-11	κ-light chain	1	2	2	standard risk	No	No	91	No	91	normal	normal	-	normal	normal	normal	No	-	+	+	-	-	60	Multiple	6.7	＜3.5	11.9	1.24	0.715	1.08	0.265	4.67	2.4	50.8	2	42.4	119	165	42.9	177.6	88.8	2.2	3.17
81	Male	75	2015-01-01	IgG-λ	3	3	3	high-risk	No	No	2	Yes	2	normal	normal	-	normal	deletion	normal	No	-	-	+	-	-		Multiple	87.39	≥3.5	118	0.291	＜0.156	0.433	0.021	5.54	3.8	68	1.4	24.9	67	75	18.2	136.4	362.7	3.24	42.41
82	Male	61	2020-07-04	κ-light chain	2	1	2	standard risk	No	No	29	No	29	normal	normal	-	normal	normal	normal	No	-	+	+	-	+	6	Multiple	0	≥3.5	6.71	0.856	0.301	0.757	0.146	5.06	2.57	50.8	1.61	31.8	108	201	42.5	150	98.3	2.59	1.57
83	Male	70	2020-11-19	IgA-λ	2	3	2	standard risk	No	No	25	No	25	abnormal	normal	-	normal	normal	normal	No	-	+	+	-	-	26.5	Multiple	21	＜3.5	3.77	34.2	0.188	0.843	0.177	5.49	3.79	69	1.24	22.6	82	152	36.1	102	82.6	2.65	3.36
84	Male	60	2020-11-10	Nonsecretory type	1	1	1	standard risk	No	No	13	Yes	13	abnormal	normal	-	normal	normal	normal	No	-	-	+	-	-	0	Multiple	15	≥3.5	5.28	0.264	0.488	0.849	0.258	5.46	2.6	47.6	2.1	38.5	133	174	42.8	147	70.5	2.29	1.2
85	Female	66	2020-06-08	κ-light chain	3	3	2	standard risk	Yes	No	30	No	30	normal	normal	-	normal	normal	normal	No	-	+	+	-	+	7	Multiple	0	≥3.5	10.5	0.412	0.177	0.664	0.388	3.17	1.47	46.3	1.28	40.4	75	185	45	140.8	65.4	2.4	0.83
86	Male	54	2019-09-17	IgA-λ	1	1	1	low-risk	No	No	39	No	39	normal	normal	-	normal	normal	normal	No	-	-	+	-	+	0	Multiple	0	≥3.5	10	6.55	0.98	1.02	0.2	7.28	4.35	59.8	2.21	30.4	134	347	44.1	127.2	88.8	2.36	1.68
87	Female	62	2019-01-24	IgG- λ	3	1	1	standard risk	No	Yes	41	No	47	normal	normal	-	normal	normal	normal	No	-	+	+	-	+	0	Multiple	10	＜3.5	16.4	3.52	0.461	1.37	0.283	10.41	7.51	72.1	2.11	20.3	135	294	44.7	143.5	53.5	2.42	39.68
88	Male	70	2019-09-26	Nonsecretory type	2	2	1	standard risk	No	No	39	No	39	normal	normal	-	normal	normal	normal	No	-	+	+	-	+	13	0	40	≥3.5	5.28	0.264	0.488	0.849	0.258	5.46	4.38	59.1	2.19	29.5	103	169	37.7	149.2	154.9	2.4	3.24
89	Male	72	2020-12-04	IgA-λ	3	3	2	standard risk	No	No	21	Yes	21	normal	normal	-	normal	normal	normal	No	-	+	+	-	-	18.5	1	33	＜3.5	6.07	41.9	0.132	0.653	0.266	4.77	2.95	61.8	1.52	31.9	79	108	35.4	118.9	172.7	2.21	3.13
90	Female	58	2020-03-12	IgG-κ	3	2	2	standard risk	No	No	33	No	33	normal	normal	-	normal	normal	normal	No	-	-	+	-	+	91	Multiple	20	＜3.5	10.4	0.247	0.488	1.06	0.315	4.41	2.14	48.5	1.87	42.5	98	189	29.8	149.4	57.5	2.13	3.87
91	Female	68	2019-03-27	λ-light chain	3	3	2	standard risk	No	No	45	No	45	normal	normal	-	normal	normal	normal	No	-	+	+	-	-	37	0	6	≥3.5	3.97	0.169	0.272	1.15	0.681	4.92	3.95	80.3	0.58	11.8	64	280	40.8	204.7	57.4	2.34	40.51
92	Male	63	2020-11-05	IgA-κ	2	1	2	standard risk	No	No	25	No	25	normal	normal	-	normal	normal	normal	No	-	+	+	-	+	4	Multiple	9	≥3.5	10.3	1.8	0.44	0.78	0.187	16.91	14.78	87.4	1.49	8.8	123	166	37.6	231	76.9	2.16	32.41
93	Female	66	2017-12-20	IgA-κ	3	1	2	standard risk	No	Yes	22	No	60	normal	normal	-	normal	normal	normal	No	-	+	+	-	-	0	Multiple	10.35	≥3.5	5.08	9.51	0.26	0.896	0.229	1.04	0.4	41.4	0.6	54.8	81	9	35.7	93.3	42	2.1	0.12
94	Male	76	2018-06-21	IgG- λ	3	3	3	high-risk	No	Yes	23	Yes	23	normal	deletion	-	normal	deletion	deletion	No	-	+	+	-	+	7.5	Multiple	8	≥3.5	8.54	＜0.245	＜0.156	0.859	0.346	9.79	8.56	87.4	0.85	8.7	65	86	41.1	380.4	537.4	2.3	16.59
95	Female	53	2017-07-19	Nonsecretory type	1	1	1	standard risk	No	Yes	12	No	65	abnormal	deletion	-	normal	deletion	normal	No	-	+	+	-	+	14	1	0	≥3.5	8.47	0.34	＜0.156	1.39	0.403	5.61	3.9	69.3	1.4	24.1	123	256	50	138.3	50	2.49	1.49
96	Male	60	2019-10-08	IgG- λ	1	3	2	standard risk	No	No	38	No	38	normal	normal	-	normal	normal	normal	No	-	+	+	-	-	0	Multiple	43	＜3.5	59.7	0.489	0.683	1.26	0.054	4.38	3.12	71.3	0.86	19.6	121	192	34.7	152.7	65.6	2.39	17.96
97	Male	55	2018-01-23	IgG- λ	3	3	2	standard risk	No	No	59	No	59	normal	deletion	-	normal	normal	normal	No	-	+	+	-	+	14	Multiple	50.8	≥3.5	73.6	＜0.245	0.202	83	335	4.22	2.2	51.7	1.6	37.9	69	99	28.7	230.1	79.5	2.21	1.27
98	Male	64	2020-07-23	Nonsecretory type	1	1	1	standard risk	No	No	29	No	29	normal	normal	-	normal	normal	normal	No	-	+	+	-	-	0	Multiple	0	≥3.5	9.3	1.27	0.519	1.24	0.407	9.03	6.19	68.6	2	22.1	136	316	45.9	263.8	65.5	2.33	3.21
99	Male	52	2018-06-27	IgG- λ	2	3	2	standard risk	No	Yes	24	Yes	24	abnormal	normal	-	normal	normal	normal	No	-	-	+	-	-	42	Multiple	41	≥3.5	40.7	＜0.245	＜0.156	1.85	0.346	4.12	2.23	54.1	1.52	36.9	117	121	38.6	191.4	84.4	2.5	5.57
100	Female	54	2019-06-26	IgG- λ	1	1	1	low-risk	No	No	42	No	42	normal	normal	-	normal	normal	normal	No	-	+	+	-	+	6.5	0	29	≥3.5	35	0.346	0.26	0.781	0.058	4.47	2.33	52.2	1.75	39.1	128	174	40.8	172.8	44.6	2.24	0.12
101	Male	65	2020-09-02	Nonsecretory type	1	3	2	standard risk	No	No	27	No	27	normal	normal	-	normal	normal	normal	No	-	+	+	-	-	10	Multiple	0	≥3.5	11.1	0.815	0.71	1.22	503	14.77	10.32	69.9	2.36	16	153	256	42.9	131.8	91.3	2.67	17.17
102	Female	53	2020-07-15	IgG- λ	2	1	1	low-risk	No	No	29	No	29	normal	normal	-	normal	normal	normal	No	-	+	+	-	-	0	0	46	＜3.5	63.5	＜.067	0.08	0.809	0.067	5.95	1.37	23.1	4.22	70.9	107	111	41.2	119.1	64.3	2.23	0.27
103	Male	47	2020-03-26	Nonsecretory type	1	1	1	low-risk	No	No	33	No	33	normal	normal	+	normal	normal	normal	No	-	+	+	-	+	0	Multiple	10	≥3.5	10.7	1.72	0.82	1.78	0.281	10.42	7.9	75.9	1.7	16.6	169	245	47.1	203.6	73.4	2.41	0.98
104	Male	58	2020-01-10	IgA-κ	1	3	2	standard risk	No	No	35	No	35	normal	normal	-	normal	normal	normal	No	-	+	+	-	+	8	0	4	＜3.5	12.1	21	0.436	1.06	0.253	9.43	6.02	63.8	2.91	30.9	123	247	41.5	169.2	123.9	2.28	10.03
105	Male	68	2020-04-26	Nonsecretory type	1	3	2	standard risk	No	No	29	Yes	29	normal	normal	-	normal	normal	normal	No	-	-	+	-	-	0	Multiple	75	≥3.5	2.38	105	0.067	0.45	0.162	4.28	1.83	42.8	2.06	48.1	81	165	27.5	109.7	120.3	2.4	1.7
106	Female	49	2020-06-07	κ-light chain	2	1	1	low-risk	No	No	30	No	30	normal	normal	-	normal	normal	normal	No	-	+	+	-	+	34	Multiple	0	＜3.5	3.38	101	1.7	1.5	1.12	9.6	6.85	71.4	1.95	20.3	110	548	47.5	190	105.2	2.55	3.44
107	Female	51	2017-12-07	IgA-κ	2	1	1	low-risk	No	Yes	41	No	60	abnormal	normal	-	normal	normal	normal	No	-	+	+	-	+	40.5	Multiple	24.17	≥3.5	3.52	31.1	＜0.156	0.901	0.26	2.85	1.5	53.7	1.1	39.3	90	181	37.8	122.5	70.2	2.41	1.49
108	Male	52	2020-09-17	IgA-κ	2	1	1	low-risk	No	No	27	No	27	normal	normal	-	normal	normal	normal	No	-	+	+	-	-	20	Multiple	0	≥3.5	8.8	4.85	0.53	1.03	0.514	4.91	3.18	64.8	1.26	25.7	117	353	44.8	136.8	86.4	2.39	13.25
109	Male	57	2019-05-05	IgG-κ+IgA-k	3	3	2	standard risk	No	No	43	No	43	normal	normal	-	normal	normal	normal	No	-	-	+	-	-	80.5	0	56	≥3.5	10.4	67.2	0.056	0.427	0.381	8.25	3.71	45	3.75	45.5	52	66	31.3	239.2	473.3	2.17	0.62
110	Male	45	2017-03-04	IgG-k	3	3	2	low-risk	No	Yes	15	Yes	15	normal	normal	-	normal	normal	normal	No	-	+	+	-	+	6	Multiple	9.23	＜3.5	14.6	0.281	＜0.156	1.37	1.05	5.46	2.7	49.5	2.1	38.1	91	70	46.5	251.3	143.3	3.31	9.14
111	Male	62	2017-02-02	IgG-k	3	3	2	standard risk	No	No	70	No	70	normal	normal	-	normal	normal	normal	No	-	+	+	-	-	2	Multiple	24.19	≥3.5	32.5	1	0.887	1.37	0.369	6.69	4.6	69	1.4	21.4	144	268	41.4	178.8	84.8	2.38	6.57
112	Male	52	2020-01-14	IgG- λ	1	1	1	low-risk	No	Yes	6	No	35	normal	normal	-	normal	normal	normal	No	-	-	+	-	-	25	Multiple	42	≥3.5	66.3	0.123	0.216	0.963	0.034	4.21	2.1	49.8	1.65	39.2	133	151	32.3	201.5	86.4	2.09	1.37
113	Female	63	2019-09-19	IgA-κ	3	3	2	standard risk	No	Yes	14	No	39	normal	normal	-	normal	normal	normal	No	-	-	+	-	-	9	Multiple	54	≥3.5	2.94	65.5	0.091	0.275	0.411	3.14	2.1	66.9	0.91	29	78	111	31.1	462.3	39.5	1.8	14.44
114	Male	44	2018-07-09	λ-light chain	3	3	2	standard risk	Yes	No	53	No	53	abnormal	normal	-	normal	normal	deletion	No	-	+	+	-	-	21	0	1	≥3.5	5.38	0.275	＜0.156	1.26	0.419	5.83	3.8	65.2	1.59	27.3	119	156	52	139.6	350.1	2.31	0.78
115	Male	28	2020-08-03	IgG-κ	1	1	1	low-risk	Yes	No	28	No	28	normal	normal	-	normal	normal	normal	No	-	+	+	-	+	0	Multiple	28	≥3.5	51	0.521	0.464	1.23	0.228	9.13	6.64	72.7	2.01	22	142	322	32	137.4	53.4	2.29	67.06
116	Male	53	2017-05-26	IgA-λ	3	3	2	standard risk	No	No	67	No	67	normal	normal	-	normal	normal	normal	No	-	-	+	-	-	11	Multiple	45.01	≥3.5	5.2	64.3	0.206	1	0.222	6.63	3	45.7	2.9	43.1	92	256	35.4	176.5	169.5	2.72	2.78
117	Male	46	2020-08-02	Nonsecretory type	1	1	1	low-risk	No	No	28	No	28	normal	normal	-	normal	normal	normal	No	-	+	+	-	-	8	1	0	＜3.5	5.28	0.264	0.488	0.849	0.258	5.46	4.58	56.9	2.83	35.2	143	341	45.9	248	87.8	2.31	2.69
118	Male	57	2020-04-27	IgG- λ	2	3	2	standard risk	No	No	5	Yes	5	normal	normal	-	normal	normal	normal	No	-	-	+	-	-	3	Multiple	75	＜3.5	95.5	0.487	0.237	0.927	0.059	7.78	4.88	62.6	1.88	24.2	120	165	42.6	670	117.8	2.7	8.74
119	Female	70	2018-02-06	IgG- λ	3	3	2	standard risk	No	Yes	17	No	58	normal	normal	-	normal	normal	deletion	No	-	+	+	-	-	5.5	0	57.74	＜3.5	75.8	0.338	＜0.156	1.23	0.062	6.86	3.2	46.1	3	44	75	206	28.6	188.6	135.9	2.13	39.26
120	Female	54	2018-11-30	L-轻链	3	3	3	high-risk	No	Yes	15	Yes	15	normal	deletion	-	normal	deletion	deletion	No	-	-	+	-	+	33	Multiple	0	＜3.5	8.67	0.748	0.347	1.29	0.424	10.43	7.69	73.7	2.04	19.6	111	192	45.1	214.2	187.3	2.63	56.05
121	Male	48	2015-11-10	Nonsecretory type	1	1	1	low-risk	Yes	No	85	No	85	normal	normal	-	normal	normal	normal	No	-	-	+	-	-	12.5	1	0	≥3.5	4.68	＜0.245	＜0.156	1.33	0.312	5.03	2.4	48.5	1.9	37.6	129	148	46.8	174.5	94.1	2.36	3.54
122	Female	52	2019-12-23	IgA-λ	2	1	1	low-risk	No	No	36	No	36	normal	normal	-	normal	normal	normal	No	-	-	+	-	-	0	0	10	＜3.5	7.45	7.77	0.741	0.812	0.205	4.42	2.15	48.6	1.8	40.7	102	230	39.7	159.4	66.4	2.17	0.26
123	Male	64	2017-12-29	IgG-κ	1	3	3	high-risk	No	No	60	No	60	normal	normal	-	normal	deletion	normal	No	-	+	+	-	+	0	1	4.4	≥3.5	17	0.844	0.666	1.15	0.186	6.07	3.6	59.6	1.5	24.9	163	227	46.4	195.8	92.5	2.25	10.78
124	Male	72	2019-01-21	IgG- λ	2	3	2	standard risk	No	No	47	No	47	normal	normal	-	normal	normal	normal	No	-	+	+	-	-	87	Multiple	68	≥3.5	92.9	＜0.245	0.107	0.798	0.03	5.95	2.61	43.9	2.35	39.5	96	234	36.6	133.9	99.6	2.19	0.23
125	Male	65	2018-08-08	IgA-κ	3	1	2	standard risk	No	No	52	No	52	normal	normal	-	normal	normal	normal	No	-	+	+	-	-	4	Multiple	4	≥3.5	5.9	14.8	0.316	0.933	114	7.52	4.64	61.7	2.39	31.8	144	150	45.6	147.3	48.1	2.38	1.49
126	Male	42	2017-04-01	IgA-K	1	1	1	low-risk	Yes	No	68	No	68	normal	normal	-	normal	normal	normal	No	-	+	+	-	-	2	Multiple	16.1	＜3.5	10.9	17.3	0.484	1.28	0.247	4.28	2.2	52.3	1.5	36	125	213	41.6	102.4	76	2.28	28.59
127	Female	47	2019-07-26	IgG- λ	3	3	2	standard risk	No	Yes	9	Yes	9	normal	normal	-	normal	normal	normal	No	-	+	+	-	-	16.5	Multiple	83	≥3.5	99	0.323	0.517	0.934	0.236	6.49	3.69	61	1.93	29.7	75	324	20.6	114.7	77.7	2.31	7.55
128	Male	67	2020-12-20	IgA-κ	3	3	2	standard risk	No	Yes	7	Yes	7	normal	normal	-	normal	normal	normal	No	-	-	+	-	+	55	Multiple	62	＜3.5	3.33	77.5	0.193	0.541	0.25	5.59	2.49	44.5	2.06	36.9	80	128	33.1	293.9	80.6	2.22	0.14
129	Male	46	2019-03-20	λ-light chain	3	3	2	standard risk	No	No	45	No	45	normal	normal	-	normal	normal	deletion	No	-	+	+	-	+	10	0	7	≥3.5	4.2	0.149	0.104	1.25	0.407	7.84	3.57	45.5	3.12	39.8	61	125	42.5	336.1	622	2.17	532
130	Female	53	2017-02-28	IgG-k	3	3	2	standard risk	No	No	70	No	70	normal	normal	-	normal	normal	normal	No	-	+	+	-	-		Multiple	32.37	≥3.5	44.1	0.346	0.262	1.26	0.139	7.35	4.8	64.5	1.9	25.9	101	26	34	231.3	122.1	3.1	6.26
131	Male	60	2018-02-09	IgG- λ	3	3	2	standard risk	No	No	58	No	58	normal	normal	-	normal	normal	normal	No	-	+	+	-	+	0	Multiple	1.42	≥3.5	3.81	0.881	0.491	1.39	0.441	8.2	5.9	71.9	1.4	16.8	63	218	38	353.2	215.7	2.6	34.53
132	Female	71	2017-05-31	κ-light chain	3	3	3	standard risk	No	No	67	No	67	normal	normal	-	normal	normal	normal	No	-	+	+	-	-	8.6	0	0	≥3.5	4.54	0.584	＜0.156	0.824	0.155	6.49	4.3	66.1	1.4	20.8	58	241	30.1	464	575.9	1.5	13.52
133	Female	55	2019-10-23	IgG-κ	3	3	2	standard risk	No	No	38	No	38	abnormal	normal	-	abnormal	normal	normal	No	-	+	+	-	-	27.5	Multiple	44	≥3.5	49.5	0.695	0.405	0.482	0.109	9.64	7.69	79.8	1.17	12.1	77	213	30.4	419.3	123.6	1.91	82.06
134	Male	57	2020-12-08	IgA-κ	3	2	2	standard risk	Yes	No	24	No	24	normal	normal	-	normal	normal	normal	No	-	-	+	-	+	49.5	0	11	＜3.5	6.78	13.7	0.318	1.16	0.267	2.86	2.29	80.1	0.52	18.2	63	67	27.4	87.5	77.3	2.18	1.68
135	Female	63	2018-05-14	IgG-κ	2	3	2	standard risk	No	Yes	8	Yes	8	normal	normal	-	normal	normal	normal	No	-	-	+	-	-	37	0	49	＜3.5	58.6	0.285	0.232	1.26	0.065	1.51	0.7	49	0.7	44.4	86	105	30.9	168.4	44	2.1	15.01
136	Female	47	2016-12-21	IgG-k	3	3	2	standard risk	No	Yes	2	No	72	abnormal	normal	-	normal	normal	abnormal	No	-	-	+	-	-	44	Multiple	87.1	＜3.5	106	＜0.245	＜0.156	0.839	0.044	4.68	2.7	57	1.2	26.3	73	151	25.8	142.1	213.3	3.07	2.24
137	Male	57	2017-03-20	IgG-λ	3	3	2	standard risk	No	No	2	Yes	2	abnormal	deletion	-	normal	normal	deletion	No	-	+	+	-	-	27.5	Multiple	34.91	＜3.5	43.5	＜0.245	＜0.156	0.942	0.033	4.14	2.4	58	1.5	35.3	92	170	29.8	214.6	137.3	1.98	31.11
138	Female	44	2019-04-03	IgA-κ	2	1	1	low-risk	Yes	No	44	No	44	normal	normal	-	normal	normal	normal	No	-	+	+	-	+	7	Multiple	26	＜3.5	5.28	0.264	0.488	0.849	0.258	5.46	8.32	83.3	1.25	12.5	101	439	32.4	98.5	42	2.42	45.57
139	Male	45	2020-12-14	λ-light chain	2	1	1	low-risk	Yes	No	24	No	24	normal	normal	-	normal	normal	normal	No	-	+	+	-	-	17	Multiple	36	≥3.5	56	0.211	0.264	1.12	0.046	6.44	3.9	60.5	1.99	30.9	99	309	38.7	135.6	66.7	2.17	21.15
140	Male	61	2020-11-02	IgG-κ	3	3	3	standard risk	No	No	25	No	25	normal	normal	-	normal	normal	normal	No	-	-	+	-	-	11.5	Multiple	11.5	＜3.5	22.1	1.34	0.285	0.952	0.455	6.57	4.03	61.4	1.63	24.8	75	152	29.8	202.4	557.1	2.12	1.22
141	Male	63	2020-06-20	IgA-κ	3	2	2	standard risk	No	No	30	No	30	normal	normal	-	normal	normal	normal	No	-	+	+	-	-	9	Multiple	1	＜3.5	6.05	0.999	0.119	0.942	0.255	5.74	3.54	61.6	1.58	27.5	83	219	41.1	156	133.5	2.42	17.88
142	Male	66	2014-10-16	Nonsecretory type	1	1	1	low-risk	No	No	98	No	98	normal	normal	-	normal	normal	normal	No	-	+	+	-	+	0	1	0	≥3.5	12.9	5.4	1.76	1.57	0.275	6.69	3.1	46	2.6	39.3	137	294	43.7	132.8	81.4	2.3	0.94
143	Female	43	2017-09-13	IgA-λ	3	2	1	low-risk	No	No	63	No	63	normal	normal	-	normal	normal	normal	No	-	+	+	-	-	57	0	49.72	≥3.5	2.85	62.4	0.266	0.993	0.219	4.05	2.3	57.6	1.3	32.1	78	154	32.6	99	63.3	2.3	1.69
144	Male	54	2017-04-25	IgA-k	2	3	2	low-risk	No	Yes	16	No	68	normal	normal	-	normal	normal	normal	No	-	+	+	-	-	18.5	0	26.92	≥3.5	4.54	33.2	＜0.156	1.02	0.258	6.69	4.2	62.5	2	29.1	89	342	37	215.7	96.7	2.31	10.54
145	Female	70	2017-03-14	IgG- λ	3	3	2	standard risk	No	No	69	No	69	normal	normal	-	normal	normal	normal	No	-	+	+	-	+		Multiple	10.68	＜3.5	18.8	0.637	0.293	1.38	0.269	4.01	2.1	52.6	1.3	32.2	110	273	53.6	229.7	81.4	2.67	9.93
146	Male	59	2015-05-13	λ-light chain	1	2	2	standard risk	No	No	11	Yes	11	normal	normal	-	normal	normal	normal	No	-	+	+	-	-	7	＞2	5.18	＜3.5	5.64	0.63	0.228	0.923	0.478	7.27	4.9	67.4	1.8	24.5	113	250	25	233	46	1.87	0.83
147	Female	62	2014-06-12	IgG-λ	3	2	3	standard risk	No	Yes	80	Yes	80	normal	normal	-	normal	normal	normal	No	-	-	+	-	-	45.5	＞2	117.77	≥3.5	138	0.47	0.325	0.718	0.041	4.8	2.6	54.7	1.6	34.2	54	149	16.2	68.4	209.4	3.35	5.52
148	Male	39	2015-12-18	IgG-λ	3	3	3	standard risk	No	No	1	Yes	1	normal	normal	-	normal	normal	normal	No	-	+	+	-	-	4.5	Multiple	82.8	≥3.5	110	＜0.245	＜0.156	0.95	0.024	7.53	4.7	61.9	2.3	30.1	60	87	27.7	486.7	123.2	3.28	6.99
149	Male	64	2020-05-07	λ-light chain	1	1	2	standard risk	No	No	31	No	31	normal	normal	-	normal	normal	normal	No	-	-	+	-	+	54.5	Multiple	0	＜3.5	8.44	1.97	0.526	1.16	0.256	8.81	6.18	70.1	1.79	20.3	154	305	41.7	192.5	96.7	2.47	1.42
150	Male	51	2017-07-05	κ-light chain	3	1	1	low-risk	No	Yes	10	Yes	10	normal	normal	-	normal	normal	normal	No	-	+	+	-	-	7.5	Multiple	0	≥3.5	5.98	0.674	＜0.156	1.35	0.412	9.36	6.3	67.6	1.9	20.2	117	268	42.4	198.3	39.9	2.36	56.3
151	Female	54	2018-07-19	IgA-κ	1	1	1	low-risk	No	No	53	No	53	normal	normal	-	normal	normal	normal	No	-	+	+	-	-		Multiple	30	≥3.5	6.36	33.2	0.462	1.3	0.491	5.52	3.9	70.3	1.3	24.3	124	254	35.9	149.3	60.2	2.33	5.81
152	Male	51	2020-09-18	Nonsecretory type	2	3	2	low-risk	Yes	No	27	No	27	normal	normal	-	normal	normal	normal	No	-	-	+	-	+	13	0	1	≥3.5	5.62	0.466	0.318	1.4	809	9.9	6.99	70.6	1.99	20.1	95	315	48	206.7	158.1	3.51	11.45
153	Male	68	2015-01-19	IgA-k	3	3	2	standard risk	No	No	95	No	95	normal	normal	-	normal	normal	normal	No	-	-	+	-	+	11	Multiple	26.79	≥3.5	6.06	36.2	＜0.156	0.978	0.27	5.2	2	38.3	2.4	46.7	117	210	41	189.2	114.1	2.36	2.15
154	Female	70	2017-02-23	IgG-k	3	2	2	standard risk	No	No	70	No	70	normal	normal	-	normal	normal	normal	No	-	+	+	-	-	9	Multiple	75.16	≥3.5	92.6	0.557	0.579	0.942	0.049	4.12	2.7	66.3	1.1	26.9	68	288	30.3	132.9	56.4	2.13	12.66
155	Male	74	2018-11-19	IgG-κ	3	3	2	standard risk	No	Yes	20	Yes	20	normal	normal	-	normal	normal	normal	No	-	+	+	-	-	40.5	0	73	≥3.5	82.4	＜0.245	＜0.156	0.381	0.021	3.7	1.43	38.8	1.7	45.9	61	71	23.5	151.1	113.1	2.31	1.84
156	Male	71	2018-11-12	IgG- λ	3	3	3	standard risk	No	No	49	No	49	abnormal	normal	-	normal	normal	normal	No	-	+	+	-	-	37	Multiple	56	＜3.5	93.9	＜0.245	0.485	1.18	＜0.018	5.78	3.46	59.8	1.98	34.3	77	309	25	280.1	61.8	2.07	0.96
157	Female	85	2019-08-26	IgA-κ	3	3	2	standard risk	No	Yes	16	No	40	normal	normal	-	normal	normal	normal	No	-	+	+	-	-	53.5	Multiple	56	＜3.5	3.75	60.2	0.247	0.509	0.181	7.99	5.68	71	1.54	19.3	73	142	31.4	121.2	238.6	2.27	4.69
158	Male	74	2014-08-01	IgG-k	3	2	2	standard risk	No	Yes	18	Yes	18	normal	normal	-	normal	normal	normal	No	-	+	+	-	-	9	Multiple	27.51	＜3.5	28.5	0.873	0.79	1.35	0.03	5.2	3.3	62.2	1.5	28.1	145	174	35.7	129.3	73.3	2	0.4
159	Male	58	2020-03-17	λ-light chain	3	1	2	standard risk	Yes	Yes	29	Yes	29	normal	normal	-	normal	normal	normal	No	-	+	+	-	+	52.5	Multiple	0	＜3.5	6.95	0.34	0.349	1.29	0.36	5.06	3.58	70.7	0.97	19.2	89	207	41.3	217.7	97.4	2.3	4.14
160	Male	63	2020-12-23	IgG-κ	1	2	2	standard risk	No	No	24	No	24	normal	normal	-	normal	normal	normal	No	-	-	+	-	+	6	Multiple	27	＜3.5	43	1.08	1.06	0.837	0.082	5.93	2.53	42.7	3	50.6	143	269	37.8	164.9	64.4	1.96	0.37
161	Female	54	2019-10-30	IgG- λ	3	2	3	high-risk	No	Yes	14	Yes	14	abnormal	Trisomy	-	abnormal	deletion	deletion	No	-	-	+	-	-	50	Multiple	80	≥3.5	102	0.356	0.283	0.789	0.041	9.83	6.21	63.2	2.46	25	63	310	23.3	120.6	76.9	2.25	6.63
162	Female	64	2019-12-23	IgG-κ	3	3	2	standard risk	Yes	Yes	29	No	36	normal	deletion	-	normal	normal	normal	No	-	+	+	-	-	50	Multiple	57	≥3.5	82.3	0.908	0.463	0.585	0.174	5.25	1.78	34	2.73	52	95	88	30.7	215.9	64.8	2.03	64.8
163	Male	66	2019-05-27	IgG-κ	2	3	2	standard risk	No	No	43	No	43	normal	normal	-	normal	normal	normal	No	-	+	+	-	-	21	Multiple	34	≥3.5	39	0.305	0.153	1.25	0.105	4.77	3.66	76.8	0.76	15.9	99	230	38.4	169.1	84.6	2.21	8.42
164	Male	45	2019-09-26	IgG-κ	3	2	2	low-risk	Yes	Yes	18	No	39	normal	normal	-	normal	normal	normal	No	-	-	+	-	-	33.5	Multiple	89	≥3.5	94.9	0.117	0.137	0.454	0.043	2.97	1.42	47.8	1.24	41.8	58	92	26.4	117.4	88.3	2.07	0.25
165	Female	59	2017-04-29	IgG-λ	3	1	1	standard risk	No	No	68	No	68	normal	normal	-	normal	normal	normal	No	-	+	+	-	-	0	Multiple	10.61	＜3.5	19.7	3.22	1.26	1.13	0.14	9.8	5.9	59.9	3.2	32.6	152	596	47.4	131.4	58.9	2.39	1.37
166	Male	46	2019-07-26	Nonsecretory type	2	1	1	low-risk	Yes	No	41	No	41	normal	normal	+	normal	normal	normal	No	-	+	+	-	+	0	Multiple	0	≥3.5	9.15	0.637	1.07	1.18	0.316	13.98	11.19	80.5	1.57	11.3	117	257	40.7	193	60.2	2.33	11.24
167	Male	54	2020-12-19	IgA-λ	1	1	1	low-risk	Yes	No	24	No	24	normal	normal	-	normal	normal	normal	No	-	+	+	-	+	0	1	14	＜3.5	10.9	16.8	0.871	0.881	0.334	6.36	3.96	62.3	1.61	25.3	143	417	39.9	126	67.5	2.37	25.12
168	Male	49	2019-02-14	IgA-κ	3	3	2	standard risk	Yes	Yes	10	No	46	normal	normal	-	normal	normal	normal	No	-	+	+	-	-	33	2	33	≥3.5	3.23	38.1	0.14	0.766	0.398	5.16	2.98	57.8	1.7	32.9	132	164	40.8	123.8	60.4	2.39	0.78
169	Female	62	2020-03-30	IgA-λ	2	3	2	standard risk	Yes	No	33	No	33	normal	normal	-	normal	normal	normal	No	-	-	+	-	+	1.5	Multiple	34	≥3.5	8.88	42.5	3.52	1.08	0.31	7.05	4.14	58.7	2.02	28.7	114	190	33.4	154.9	62.2	2.31	1.87
170	Female	53	2018-12-18	IgG-κ	2	2	1	low-risk	Yes	No	48	No	48	abnormal	normal	+	abnormal	normal	normal	No	-	+	+	-	-	23	Multiple	44	≥3.5	5.28	0.264	0.488	0.849	0.258	5.46	1.77	41.18	2.24	53	89	289	31.8	130.1	54.7	2.33	0.75
171	Male	58	2020-03-17	IgG- λ	2	1	1	standard risk	Yes	No	33	No	33	normal	normal	-	normal	normal	normal	No	-	+	+	-	+	9	Multiple	32	＜3.5	26.4	0.617	0.348	1.15	0.359	8.26	5.57	67.4	1.85	22.4	115	357	38	157.3	57.3	2.46	6.11
172	Female	50	2018-09-25	Nonsecretory type	1	1	1	low-risk	No	No	51	No	51	normal	normal	-	normal	normal	normal	No	-	+	+	-	-	6	Multiple	0	≥3.5	8.44	1.26	0.572	1.26	0.367	4.77	1.76	36.9	2.46	52	132	262	49.3	163.4	51	2.62	0.36
173	Male	51	2017-11-17	IgA-κ	3	3	2	standard risk	No	No	61	No	61	normal	normal	-	normal	normal	normal	No	-	-	+	-	+	5.5	Multiple	12.62	≥3.5	4.47	19	0.217	0.793	0.207	6.58	4.3	65.2	1.7	26.3	109	172	40.6	143.1	83.8	2.44	0.31
174	Male	43	2018-11-13	κ-light chain	1	1	1	low-risk	No	No	49	No	49	normal	normal	-	normal	normal	normal	No	-	+	+	-	-	6.5	0	0	＜3.5	5.28	0.264	0.488	0.849	0.258	5.46	3.5	66.6	1.37	26.1	120	237	46.9	147.4	79.2	2.53	0.38
175	Female	71	2020-08-29	IgA-κ	2	1	2	standard risk	No	No	28	No	28	normal	normal	-	normal	normal	normal	No	-	+	+	-	-	10	Multiple	4	≥3.5	7.8	8.61	0.498	0.997	0.201	6.26	3.48	55.6	2.09	33.4	93	198	45	186	47.5	2.39	1.25
176	Male	68	2020-06-26	IgG-κ	2	1	2	standard risk	No	No	30	No	30	normal	normal	-	normal	normal	normal	No	-	+	+	-	-	0	Multiple	36	＜3.5	49.5	0.113	0.098	0.848	0.102	6.35	3.95	62.2	2.25	35.4	107	310	37.1	306.4	47.8	1.81	73.04
177	Male	59	2017-10-24	IgG- λ	3	1	2	standard risk	No	Yes	33	No	62	normal	normal	-	normal	normal	normal	No	-	+	+	-	+	26	0	37.71	＜3.5	42.7	＜0.245	＜0.156	0.742	14.5	3.63	2.1	58.3	1.2	32.2	79	125	31.3	92.2	103.4	2.07	0.74
178	Male	75	2020-10-17	IgA-λ	1	3	2	standard risk	No	No	26	No	26	normal	normal	-	normal	normal	normal	No	-	-	+	-	-	11.2	Multiple	18	≥3.5	26.3	0.587	0.236	1.45	0.262	9.25	7.22	78.1	1.46	15.8	125	284	35.7	148	105.7	2.06	70.98
179	Male	63	2019-12-15	IgG-κ	1	1	1	low-risk	No	No	36	No	36	normal	normal	-	normal	normal	normal	No	-	-	+	-	-	5.5	Multiple	23	≥3.5	47.1	1.42	0.568	0.807	0.221	6.9	3.3	47.9	2.57	37.2	125	182	38.3	198.1	63.4	2.21	1.21
180	Female	44	2015-04-20	κ-light chain	3	3	3	standard risk	No	No	53	Yes	53	normal	normal	-	normal	normal	normal	No	-	-	+	-	+	16	0	0	≥3.5	3.93	0.512	0.35	0.587	0.242	9.68	7.3	75.6	1	10.3	83	438	27.7	441.4	661	1.56	129.8
181	Male	43	2015-03-09	IgG-k	3	3	2	standard risk	No	Yes	77	Yes	77	abnormal	normal	-	normal	normal	normal	No	-	+	+	-	-	0	＞2	53.55	≥3.5	65.7	0.575	＜0.156	0.318	0.102	6.23	3.7	59.7	1.3	21	83	231	31.9	146.2	133.2	2.25	14.68
182	Female	51	2017-11-09	IgG- λ	1	1	1	low-risk	No	No	61	No	61	normal	normal	-	normal	normal	normal	No	-	+	+	-	-	3	Multiple	32.44	＜3.5	36.4	0.902	0.538	1.29	0.068	5.04	2.7	49.6	2.2	40.6	103	333	39.9	114.8	55.1	2.69	1.36
183	Male	75	2019-03-29	IgG- λ	2	3	2	standard risk	No	No	45	No	45	normal	normal	-	normal	normal	normal	No	-	+	+	-	-	17	Multiple	50	≥3.5	9.23	1.73	0.395	1.19	0.153	5.97	3.01	50.4	2.31	38.7	113	151	30.7	112.9	63.4	2.26	0.35
184	Male	68	2017-08-31	λ-light chain	3	3	2	high-risk	No	Yes	42	No	64	normal	normal	-	normal	deletion	normal	No	-	-	+	-	-	73	0	14.77	＜3.5	6.4	0.269	0.242	1.14	0.622	10.01	6.6	65.5	2	20.3	72	248	42.3	191.2	200.8	2.47	30.06
185	Female	76	2014-01-23	IgG-k	2	3	3	standard risk	No	No	9	Yes	9	normal	normal	-	normal	normal	normal	No	-	+	+	-	-		2	58.03	＜3.5	81	＜0.255	0.179	0.58	0.082	7	3.4	48.3	3	43.7	99	230	32.7	349.8	67.7	2.09	0.59
186	Male	54	2019-11-11	IgG- λ	2	3	2	standard risk	Yes	No	37	No	37	normal	normal	-	normal	normal	normal	No	-	+	+	-	-	13	0	75	≥3.5	85.4	0.491	0.145	0.68	0.055	5.87	3.32	56.5	1.9	32.4	97	298	28	142.6	81	3.15	1.62
187	Male	69	2014-05-01	IgG-λ	3	3	3	standard risk	No	Yes	8	No	103	normal	normal	-	abnormal	normal	normal	No	-	+	+	-	-	29	0	54.65	≥3.5	70.8	＜0.228	0.229	0.562	0.084	13.1	7.7	59.1	4	30.9	64	116	29.6	5951	91.6	1.81	62.04
188	Male	67	2015-01-05	κ-light chain	2	2	3	standard risk	No	Yes	35	No	95	normal	normal	-	normal	normal	normal	No	-	+	+	-	-	16	＞2	0	≥3.5	5.12	0.336	＜0.156	1.37	0.358	8.78	7.1	80.8	0.9	10.6	120	295	35.1	246.2	114.8	1.92	19.28
189	Female	64	2015-05-19	IgA-λ	2	3	2	standard risk	No	Yes	15	No	91	normal	normal	-	normal	normal	normal	No	-	+	+	-	-	10.5	＞2	32.8	≥3.5	6.15	17.1	0.314	1.18	0.286	4.17	3.2	76	0.8	18.7	77	158	36	145.4	57.6	2.23	0.9
190	Male	67	2017-01-07	λ-light chain	3	1	1	standard risk	No	Yes	27	No	71	normal	normal	-	normal	normal	deletion	No	-	-	+	-	+	9.5	Multiple	0	＜3.5	11.6	1.91	0.435	1.21	0.317	9.76	5.9	60.7	2.4	25	140	292	48.7	223.3	86.3	2.77	1.12
191	Female	51	2017-04-06	IgA-λ	1	3	1	standard risk	No	No	0	Yes	0	abnormal	normal	-	normal	deletion	normal	No	-	+	-	-	+	16.5	0	31.48	≥3.5	4.09	55	＜0.156	0.836	0.219	5.65	3.2	55.7	1.9	34.3	126	196	47.7	224.4	54.7	2.41	2.18
192	Male	65	2018-03-04	IgG-λ	3	3	3	standard risk	No	Yes	9	Yes	9	normal	normal	-	normal	normal	normal	No	-	-	-	-	-	67.5	Multiple	77.46	≥3.5	91.4	＜0.245	＜0.156	0.406	0.037	8.31	6	71.6	1.6	19.4	54	71	17.2	310.3	171.7	2.63	125.8
193	Male	49	2016-04-01	λ-light chain	3	3	3	high-risk	No	Yes	10	Yes	10	abnormal	deletion	-	abnormal	deletion	abnormal	No	-	+	-	-	-	22.5	Multiple	5.26	＜3.5	8.39	0.275	＜0.156	1.35	0.261	4.84	2.6	52.7	1.8	37.4	121	165	48.1	255.4	74.2	2.55	1.03
194	Female	50	2019-05-09	IgG- λ	3	3	2	standard risk	No	No	43	No	43	normal	normal	-	normal	normal	normal	No	-	-	-	-	-	20.6	Multiple	74	≥3.5	91.7	＜0.245	0.11	0.388	0.035	3.97	1.41	35.5	2.09	52.6	57	235	30.1	190.2	78.3	2.03	1.27
195	Male	57	2016-02-29	IgG-k	3	3	2	standard risk	No	No	82	No	82	normal	normal	-	normal	normal	normal	No	-	+	-	-	-	1	1	83.93	≥3.5	107	0.297	＜0.156	0.49	0.018	6.14	2.6	42	3	48.7	86	167	26.8	128.2	91.1	2.25	1.05
196	Male	57	2015-01-28	IgG-λ	1	2	2	standard risk	No	No	95	No	95	normal	normal	-	normal	normal	normal	No	-	+	-	-	-	8.4	1	48.24	＜3.5	27.7	＜0.245	0.167	1.16	0.113	6.27	3.8	56.9	2.1	30.8	119	160	33.9	134.1	64.2	2.02	3.49
197	Female	59	2016-07-02	IgA-k	3	1	2	standard risk	No	No	77	No	77	normal	normal	-	normal	normal	normal	No	-	+	-	-	-	25.26	1	19.99	≥3.5	4.07	7.51	＜0.156	1.13	0.31	3.5	1.7	47.5	1.4	39.1	79	228	40	156.3	40.9	2.06	0.78
198	Male	65	2015-04-28	κ-light chain	1	3	1	standard risk	No	No	11	Yes	11	normal	normal	-	normal	normal	normal	No	-	+	-	-	+	10.5	2	0	≥3.5	10.9	1.29	0.68	0.909	0.267	6.08	3.8	62.8	1.8	29.1	121	197	44.9	163.7	85.7	2.34	0.38
199	Female	62	2017-05-08	IgG-k	1	3	2	standard risk	No	No	67	No	67	normal	normal	-	normal	normal	normal	No	-	+	-	-	-	51	0	64.75	≥3.5	77.5	＜0.245	＜0.156	0.74	0.034	3	1.7	57.8	1.1	37.3	53	266	26.5	151.7	71.6	1.93	0.77
200	Female	65	2016-05-03	IgG-λ	3	3	3	high-risk	No	No	1	Yes	1	normal	normal	-	normal	deletion	normal	No	-	-	-	-	-	21	Multiple	64.33	≥3.5	74.1	0.328	＜0.156	0.633	0.102	5.25	2.9	55.2	1.7	33	55	97	14	475	172.3	1.99	6.69
201	Male	74	2015-10-23	IgG-λ	3	3	3	standard risk	No	No	2	Yes	2	normal	normal	-	normal	normal	deletion	No	-	-	-	-	-	19	0	35.52	≥3.5	40.6	＜0.245	＜0.156	0.997	0.103	5.49	2.5	45.3	2.5	44.8	88	89	38.9	288.2	78.4	2.04	12.83
202	Female	36	2016-03-10	IgG-k	1	1	1	low-risk	No	No	81	No	81	normal	normal	-	normal	normal	normal	No	-	+	-	-	-	0	0	1.9	＜3.5	17.2	1.81	0.85	1.15	0.427	6.95	4	57.5	2.3	33.7	132	343	45	149.6	51.7	2.29	0.75
203	Female	61	2016-07-14	IgG-λ	3	3	3	high-risk	No	Yes	58	Yes	58	normal	normal	-	abnormal	normal	normal	No	-	-	-	-	-	15.5	0	79.18	≥3.5	44.2	＜0.245	＜0.156	0.701	0.162	4.89	2.1	42.6	2.1	42.1	48	98	18.3	503.1	74.1	1.8	11.28
204	Male	61	2020-10-30	IgG-κ	3	3	2	standard risk	No	No	26	No	26	normal	normal	-	normal	normal	normal	No	-	-	-	-	-	5	Multiple	15	＜3.5	21.9	0.602	1.51	0.657	0.154	11.53	7.84	68	2.7	23.8	89	468	27.6	170.8	119.9	2.1	87.98
205	Male	65	2019-09-12	IgG-κ	2	2	1	standard risk	No	No	39	No	39	normal	normal	-	normal	normal	normal	No	-	+	-	-	-	78	Multiple	24	≥3.5	34	0.481	0.127	766	0.131	4.78	2.74	57.4	1.68	35.1	116	191	40.9	113.2	63.4	2.46	1.47
206	Male	62	2019-01-02	IgG-κ	3	3	2	low-risk	No	No	47	No	47	normal	normal	-	normal	normal	normal	No	-	+	-	-	-	61	Multiple	52	≥3.5	77	＜0.245	0.319	0.786	0.299	8.35	3.35	40.2	4.55	54.5	65	137	36.5	156.4	88.4	2.19	5.38
207	Female	61	2019-08-09	IgG-κ	1	1	2	low-risk	No	No	40	No	40	normal	normal	-	normal	normal	normal	No	-	+	-	-	-	12	Multiple	29	≥3.5	35.7	0.297	0.536	1.06	0.044	6.39	3.73	58.3	2.16	33.8	126	278	34.1	176.3	38.1	2.27	1.08
208	Male	71	2019-04-24	IgA-κ	2	3	2	standard risk	No	No	44	No	44	normal	normal	-	normal	normal	normal	No	-	+	-	-	+	25	Multiple	11	≥3.5	5.63	8.36	0.164	0.946	0.306	5.37	2.99	55.7	1.8	33.5	88	194	40.7	190.3	123	2.37	5.76
209	Male	68	2015-03-25	IgG-λ	2	3	2	standard risk	No	Yes	17	Yes	17	normal	normal	-	normal	normal	normal	No	-	-	-	-	-	15	＞2	61.26	≥3.5	2.52	71.7	＜0.156	0.899	0.288	4.57	2.9	62.3	1.3	7.7	91	96	24.5	119.8	71.1	2.06	9.85
210	Female	64	2016-02-01	IgG-λ	2	2	2	standard risk	No	Yes	12	No	82	abnormal	normal	-	normal	normal	normal	No	-	-	-	-	-	37.5	0	60.47	≥3.5	79.1	＜0.245	＜0.156	1.08	0.023	5.71	3.5	60.4	1.9	33.6	108	206	31.4	208.4	52.7	2.23	4.2
211	Female	52	2015-09-16	IgG-k	2	3	2	standard risk	No	Yes	31	No	87	normal	normal	-	normal	normal	normal	No	-	+	-	-	+	43.5	Multiple	43.5	≥3.5	59.2	0.862	0.705	0.722	0.105	3.07	1.8	57.6	1.1	34.9	88	208	26.6	170.5	62.9	2.08	10.06
212	Male	57	2017-01-20	IgG-k	3	1	1	standard risk	No	No	71	No	71	normal	normal	-	normal	normal	normal	No	-	+	-	-	-	34.5	Multiple	21.41	＜3.5	30.5	＜0.245	0.256	1.44	0.018	7.17	4.7	66.1	2.1	29.1	124	287	44.2	148.8	74.3	2.44	4.99
213	Female	29	2017-04-24	IgG-k	1	1	1	low-risk	No	Yes	27	No	68	normal	normal	-	normal	normal	normal	No	-	+	-	-	-	0	2	3.89	＜3.5	15.02	4.1	4.05	1.11	0.319	5.28	2.8	51.2	2.1	39	131	344	45	148.5	50.3	2.44	0.36
214	Female	59	2016-02-02	IgG-λ	1	1	1	low-risk	No	Yes	21	Yes	21	normal	normal	-	normal	normal	normal	No	-	+	-	-	-	0	2	18.05	≥3.5	33	3.36	1.17	1.78	0.179	5.21	3.1	60	1.5	29.2	129	377	38.8	145.8	50.1	2.4	8.5
215	Male	59	2014-09-09	IgG-λ	2	3	3	standard risk	No	Yes	33	Yes	33	normal	normal	-	normal	normal	normal	No	-	-	-	-	-	0	0	19.59	＜3.5	25	＜0.245	0.164	1.09	0.113	3.4	1.7	49.2	1.2	35.2	89	118	40.4	158.4	111.5	2.21	6.96
216	Male	52	2016-07-15	IgG-λ	3	3	2	standard risk	No	Yes	7	Yes	7	abnormal	normal	-	normal	normal	normal	No	-	+	-	-	-	2	Multiple	75.97	＜3.5	81.1	0.624	0.233	1.54	0.017	11.57	6.4	55.5	4.4	38.1	97	150	33.7	208.9	51.4	2.69	10.81
217	Male	54	2016-10-08	IgG-λ	1	1	1	low-risk	No	No	74	No	74	normal	normal	-	normal	normal	normal	No	-	+	-	-	+	5	1	15.87	≥3.5	30.2	2.3	1.08	1.19	0.292	6.8	3.4	50.2	2.1	30.4	139	282	38.4	180.3	82.3	2.21	0.89
218	Female	47	2016-05-30	λ-light chain	3	3	2	low-risk	No	No	79	No	79	normal	normal	-	normal	normal	normal	No	-	+	-	-	-	3	0	2.32	≥3.5	9.21	0.294	0.171	1.52	0.612	5.06	2.3	46.2	2.2	42.5	68	116	43.2	242.9	84.4	2.52	51.08
219	Male	72	2016-11-04	IgG-k	3	3	2	high-risk	No	Yes	19	Yes	19	abnormal	normal	-	normal	deletion	abnormal	No	-	+	-	-	-	6.5	Multiple	69.42	＜3.5	68.9	0.238	＜0.156	0.668	0.268	3.86	1.7	42.9	1.7	43.7	86	216	27	189.5	190.3	2.18	1.22
220	Male	62	2017-04-22	λ-light chain	1	3	2	standard risk	No	Yes	3	No	68	normal	normal	-	normal	normal	normal	No	-	+	-	-	-	32.5	0	8.54	≥3.5	5.47	0.448	＜0.156	1.13	0.275	10.95	6.3	57.3	3.7	34	150	124	47.5	173.1	108	2.39	3.3
221	Male	72	2014-10-20	IgG-λ	2	2	2	standard risk	No	No	98	No	98	normal	normal	-	normal	normal	normal	No	-	+	-	-	+	31	＞2	59.52	＜3.5	68.2	0.499	0.258	0.642	0.561	4.83	3.1	63.2	1	20.5	108	251	27.5	112.2	93.2	1.9	9.65
222	Male	44	2015-04-06	IgG-k	3	3	2	standard risk	No	No	3	Yes	3	normal	normal	-	normal	normal	normal	No	-	-	-	-	-	38	＞2	82.97	≥3.5	74.2	＜0.245	＜0.156	0.644	0.163	7.98	5.4	67.1	2.3	28.4	57	305	24.8	79.1	175.1	2.2	1.06
223	Male	45	2016-11-09	λ-light chain	2	3	2	standard risk	No	No	0	Yes	0	normal	normal	-	normal	normal	normal	No	-	-	-	-	-	25	0	9.33	≥3.5	4.94	＜0.245	＜0.156	0.861	0.227	11.36	6.2	54.1	3.3	28.7	95	346	45.8	220.3	85.3	2.37	0.99
224	Female	51	2015-07-01	IgG-λ	1	1	1	low-risk	No	No	89	No	89	normal	normal	-	normal	normal	normal	No	-	+	-	-	+	16	0	10.83	＜3.5	19.4	1.85	1.01	1.12	0.241	10.3	7	67.4	2.4	23.5	111	440	39.4	155.1	41.5	2.29	44.75
225	Male	56	2015-02-06	IgA-k	3	3	3	standard risk	No	No	94	No	94	abnormal	normal	-	normal	normal	normal	No	-	+	-	-	+	22.5	Multiple	21.67	≥3.5	4.25	32.6	＜0.156	2.87	0.479	9.8	5.2	56.9	3	32.8	120	248	43.9	532.5	93.3	2.49	39.83
226	Male	49	2015-03-25	IgG-λ	3	3	2	standard risk	No	No	0	Yes	0	normal	normal	-	normal	normal	normal	No	-	-	-	-	-	8.5	1	64.14	≥3.5	72.7	＜0.245	＜0.156	0.745	0.05	4.77	2.3	48.3	1.9	39.4	75	152	21.8	112.2	496.5	3.48	1.99
227	Male	46	2015-07-07	IgG-λ	2	1	1	low-risk	No	No	89	No	89	normal	normal	-	normal	normal	normal	No	-	-	-	-	-		Multiple	29.8	＜3.5	43	0.456	0.174	1.35	0.108	8.5	5	58.9	2.3	27.1	95	356	41.9	174.5	84.4	2.4	1.03
228	Male	52	2015-06-17	IgG-k	3	3	3	standard risk	No	No	90	No	90	normal	normal	-	normal	normal	normal	No	-	+	-	-	-	0	1	83.95	≥3.5	29.3	＜0.245	＜0.156	0.197	＜0.017	4.2	1.8	42.3	1.8	44	60	77	22.1	247.3	103.9	1.93	1.55
229	Female	50	2016-02-26	IgD-λ	2	2	2	low-risk	No	Yes	34	No	82	normal	normal	-	normal	normal	normal	No	-	-	-	-	-	0	0	0	＜3.5	11.7	2.24	0.553	1.12	0.294	6.88	4.6	67.6	1.8	26.7	91	304	42.7	188.4	165.5	2.32	1.12
230	Female	58	2015-03-25	IgG-k	3	3	2	standard risk	No	No	93	No	93	normal	normal	-	normal	normal	normal	No	-	-	-	-	-		Multiple	41.61	≥3.5	59.6	＜0.245	0.201	1.15	0.306	4.72	2.9	60.8	1.4	30.3	91	173	28.4	157	83.2	2.28	2.43
231	Male	56	2020-10-11	IgG-κ	3	3	2	standard risk	Yes	No	26	No	26	normal	normal	-	normal	normal	normal	No	-	+	-	-	-	5.5	Multiple	67	≥3.5	121	0.249	0.253	0.957	0.115	7.45	4.27	57.3	2.63	35.3	73	283	23.1	174	75.5	1.88	85.82
232	Male	62	2020-05-22	IgA-λ	3	3	2	standard risk	Yes	No	27	Yes	27	normal	normal	-	normal	normal	normal	No	-	+	-	-	-	11.5	Multiple	32	≥3.5	3.17	42.4	0.115	0.815	0.175	4.95	2.92	59	1.52	30.7	82	262	33.5	230.3	89.6	2.18	21.49
233	Male	65	2020-09-15	IgA-κ	3	2	2	standard risk	No	No	27	No	27	normal	normal	-	normal	normal	normal	No	-	-	-	-	-	32	Multiple	32	＜3.5	4.27	39.2	0.063	0.748	0.245	8	5.29	66.1	2.04	25.5	80	190	33.4	117.4	489.2	2.49	3.43
234	Female	84	2018-08-09	IgA-κ	2	2	2	standard risk	No	Yes	30	No	52	abnormal	normal	-	normal	normal	deletion	No	-	+	-	-	-	31	Multiple	42	≥3.5	10.2	45.9	0.192	1.45	0.439	6.65	4.16	62.5	1.9	28.6	90	301	32.4	93.1	57.8	2.37	62.23
235	Male	53	2019-02-19	IgA-κ	3	3	2	standard risk	Yes	Yes	16	No	46	normal	normal	-	normal	normal	normal	No	-	-	-	-	-	43	Multiple	59	≥3.5	7.41	72.7	0.284	0.81	0.207	6.04	3.33	55.1	2.22	36.8	64	226	30.3	156.3	169	3.2	32.04
236	Male	81	2016-08-11	IgG-k	3	3	2	standard risk	No	Yes	52	Yes	52	normal	normal	-	normal	normal	normal	No	-	+	-	-	-	0	Multiple	26.66	≥3.5	17.5	0.277	0.363	0.959	0.228	6.35	5	78.3	0.9	14.5	123	167	29.8	131.4	141	2.12	0.44
237	Male	58	2014-04-29	IgG-k	1	1	1	底危	No	Yes	3	No	104	normal	normal	-	normal	normal	normal	No	-	-	-	-	-	0	1	15.45	＜3.5	28.4	＜0.228	＜0.170	1.43	0.304	11.7	6	51.2	4.5	38.3	142	325	47.3	166.1	61	2.59	1.36
238	Male	54	2020-11-18	IgA-κ	2	3	2	low-risk	No	No	25	No	25	normal	normal	-	normal	normal	normal	No	-	-	-	-	-	32.5	Multiple	8	≥3.5	2.31	12.8	0.052	0.863	0.258	3.53	2.92	82.7	0.47	13.3	94	196	30.9	135.8	55.3	2.01	0.55
239	Male	54	2018-11-21	IgD- λ	3	3	2	standard risk	No	Yes	22	No	49	normal	normal	-	normal	normal	normal	No	-	+	-	-	+	71	Multiple	3	≥3.5	3.78	＜0.245	＜0.156	0.979	0.658	4.98	3.41	68.5	1.18	23.7	51	448	34.6	205	157.5	2.53	33.72
240	Male	63	2017-04-01	IgG-k	3	1	1	standard risk	No	Yes	11	No	68	normal	normal	-	normal	normal	normal	No	-	+	-	-	-	0	Multiple	5.28	＜3.5	21.3	3.04	1.25	1.8	0.357	6.42	4.9	76.5	1.1	16.4	133	307	39.8	148.1	81.5	2.27	28.8
241	Female	39	2019-07-08	λ-light chain	2	1	1	low-risk	No	Yes	32	No	41	normal	normal	-	normal	normal	normal	No	-	-	-	-	-	92.5	Multiple	0	≥3.5	9.95	1.11	0.93	1.42	0.49	6.13	3.47	56.7	2.14	34.9	92	367	44.7	150.3	52.2	2.92	4.58
242	Male	66	2021-10-23	IgA-λ	3	3	2	standard risk	No	No	14	No	14	normal	normal	-	normal	normal	normal	No	-	+	-	-	-	46.5	0	73	≥3.5	90.6	＜0.245	0.194	0.581	0.032	5.59	3.36	60.1	1.17	30.6	63	204	30.8	108.6	83.8	2.37	1.64
243	Male	55	2018-11-05	IgG-κ	1	3	2	standard risk	No	No	49	No	49	normal	deletion	-	normal	normal	normal	No	-	+	-	-	-	8	0	51	≥3.5	72.8	0.319	0.298	1.54	0.075	6.57	3.43	52.2	2.56	39	117	154	31.1	143.4	97	2.17	0.96
244	Female	58	2019-02-15	λ-light chain	3	3	2	standard risk	No	Yes	42	No	46	normal	normal	-	normal	normal	normal	No	-	+	-	-	-	21	0	12	≥3.5	4.85	0.296	0.347	0.997	0.324	7.49	5.55	74	1.19	15.9	64	196	34.1	349.6	144.9	1.85	42.41
245	Female	64	2018-06-11	IgG- λ	3	3	3	high-risk	No	No	54	No	54	normal	normal	-	normal	deletion	normal	No	-	+	-	-	-	33	Multiple	64	≥3.5	64.7	＜0.245	＜0.156	0.638	0.288	5.01	2.1	40.9	2.6	50.9	61	143	25.6	203.5	186.1	2.11	0.57
246	Male	60	2017-02-01	κ-light chain	3	1	2	standard risk	No	Yes	12	No	70	normal	normal	-	normal	normal	normal	No	-	+	-	-	-	8.5	Multiple	0	≥3.5	5.28	0.264	0.488	0.849	0.258	5.46	3	58.4	1.5	28	106	205	45.2	201.4	81.9	2.27	0.81
247	Male	60	2019-10-23	IgG-κ	2	2	2	standard risk	No	No	38	No	38	normal	normal	-	normal	normal	normal	No	-	+	-	-	-	27	0	72	＜3.5	84.9	0.081	0.141	0.611	0.11	5.05	2.51	49.7	2.05	40.6	97	187	28.7	104.5	78.6	2.11	1.24
248	Male	62	2019-11-04	IgA-λ	3	3	2	standard risk	No	Yes	34	Yes	34	normal	normal	-	normal	normal	normal	No	-	+	-	-	-	6.5	0	10	＜3.5	2.34	29.7	0.062	0.748	0.261	2.83	1.2	42.4	1.3	45.9	65	91	28.2	179.3	367.2	1.78	18.61
249	Female	65	2018-01-24	κ-light chain	3	3	2	standard risk	No	No	59	No	59	normal	normal	-	normal	normal	normal	No	-	+	-	-	-	16	Multiple	0	≥3.5	8.29	0.665	0.362	1.31	0.712	8.19	5.3	64.2	1.9	23.6	104	391	44.4	179.1	390.6	2.4	4.99
250	Male	57	2017-08-29	IgG-κ	3	3	1	standard risk	No	Yes	3	No	64	abnormal	deletion	-	abnormal	normal	deletion	No	-	+	-	-	-	10	Multiple	36.99	≥3.5	51	0.68	0.519	1.16	0.056	5.32	2.6	48.9	2.2	41.4	120	176	38	136.6	72.8	2.08	1.29
251	Male	56	2019-11-22	IgG-κ	2	1	1	low-risk	Yes	No	37	No	37	normal	normal	-	normal	normal	normal	No	-	+	-	-	-	0	Multiple	45	≥3.5	63.1	0.781	0.286	0.866	0.153	8.31	5.19	61.7	2.39	28.8	117	254	35.3	153.9	74.1	2.02	9.25
252	Male	39	2019-07-23	IgG-κ+IgA-k	3	3	2	standard risk	Yes	No	41	No	41	normal	normal	-	normal	normal	normal	No	-	+	-	-	-	8.5	0	34	≥3.5	5.51	47.7	0.086	1.04	0.219	5.24	3.61	68.9	1.28	24.4	64	228	38.4	87.9	407.9	2.35	8.29
253	Male	60	2018-03-22	κ-light chain	1	1	2	standard risk	No	Yes	37	No	57	abnormal	deletion	-	abnormal	normal	deletion	No	-	+	-	-	-	3.5	Multiple	0	≥3.5	9.55	1.14	0.363	1.39	0.214	7.13	4.4	60.9	2.3	32	159	238	47.4	297.4	76.2	2.45	3.42
254	Female	50	2018-11-08	IgG- λ	2	1	1	low-risk	No	No	49	No	49	normal	deletion	-	normal	normal	deletion	No	-	+	-	-	-	97.5	Multiple	16	≥3.5	22.2	＜0.245	＜0.156	0.965	0.17	3.73	2.37	63.6	1.02	27.3	92	172	41.8	240.8	57.2	2.25	0.95
255	Male	60	2020-03-26	IgG- λ	3	3	2	standard risk	No	No	33	No	33	abnormal	normal	-	normal	normal	normal	No	-	+	-	-	-	21	0	45	＜3.5	75.8	0.137	0.164	1.01	0.246	4.26	2.52	59.1	1.27	29.8	77	109	29.4	202.2	69.7	2.13	11.54
256	Male	50	2018-11-09	IgG-κ	3	3	2	standard risk	No	No	49	No	49	normal	normal	-	normal	normal	normal	No	-	-	-	-	-	16.5	Multiple	114	＜3.5	128	＜0.245	＜0.156	0.7	0.027	6.6	3.05	46.2	2.82	42.7	67	143	16.8	120	85	1.88	10.1
257	Male	43	2017-11-14	λ-light chain	3	1	3	standard risk	No	Yes	5	No	61	abnormal	normal	-	normal	normal	normal	No	-	+	-	-	-	0	Multiple	0	＜3.5	9.12	2.52	0.813	1.47	0.181	8.61	5.1	58.7	2.5	28.9	137	239	48.8	277.8	62.4	2.42	9.3
258	Male	80	2017-11-17	IgG-κ	2	2	2	standard risk	No	Yes	53	No	61	normal	normal	-	normal	normal	normal	No	-	+	-	-	-	37	1	36.13	＜3.5	33.8	＜0.245	＜0.156	1.04	0.118	4.82	3	63.1	1.3	26.1	102	212	32.2	127.1	177.5	1.93	2.82
259	Female	56	2019-05-22	IgG- λ	2	3	2	standard risk	Yes	Yes	34	No	43	normal	normal	-	normal	normal	deletion	No	-	-	-	-	-	21	Multiple	19	≥3.5	28.2	0.229	0.51	1.33	0.142	5.11	2.46	48.1	2.16	42.3	94	305	36.5	160.2	71.4	2.57	1.09
260	Male	63	2016-01-06	IgD-λ	3	3	2	standard risk	No	Yes	53	No	83	abnormal	normal	-	normal	normal	normal	No	-	+	-	-	+	3.5	Multiple	6.47	≥3.5	4.83	0.543	＜0.156	0.929	0.28	6.28	4	63.6	1.6	25.6	77	189	37.3	138.3	739	2.28	6.71
261	Male	64	2019-09-12	IgG- λ	3	3	2	standard risk	No	No	39	No	39	normal	normal	-	normal	normal	normal	No	-	-	-	-	-	0	0	78	≥3.5	95.2	＜.067	0.174	0.62	0.179	4.06	2.44	60.2	1.24	30.5	62	157	22.9	362.9	108.2	1.57	22.35
262	Male	56	2017-08-07	IgG-λ	3	3	2	high-risk	No	Yes	23	No	64	normal	normal	-	normal	deletion	normal	No	-	-	-	-	-	29.5	0	57.46	≥3.5	60.7	＜0.245	＜0.156	0.878	0.147	2.26	1	43.5	1	45.1	75	201	32	104.6	72.9	2.01	2.01
263	Male	60	2019-05-08	IgG-κ	1	1	1	standard risk	No	No	43	No	43	normal	normal	-	normal	normal	normal	No	-	+	-	-	-	0	0	22	≥3.5	33.1	1.13	1.28	1.08	0.114	6.8	4.03	59.2	2.2	32.4	125	367	37.3	148.5	43.4	2.21	0.62
264	Male	52	2016-06-01	λ-light chain	2	3	2	standard risk	No	No	78	No	78	normal	normal	-	normal	normal	normal	No	-	-	-	-	-	21	Multiple	2.64	≥3.5	7.64	0.551	＜0.156	1.08	2.12	5.37	2.9	54.7	1.2	23.1	86	170	43.5	221.6	368.4	2.78	2.27
265	Male	61	2018-03-30	κ-light chain	3	3	2	standard risk	Yes	No	57	No	57	normal	normal	-	normal	normal	normal	No	-	-	-	-	-	67.5	Multiple	71.12	≥3.5	91.7	0.399	＜0.156	0.722	0.021	6.46	2.6	40.5	3	46.6	101	329	37.7	111.8	79.2	2.57	0.79
266	Female	64	2020-02-25	IgG- λ	3	3	2	standard risk	Yes	No	34	No	34	normal	normal	-	normal	normal	normal	No	-	+	-	-	-	15.5	0	70	＜3.5	98.6	0.161	0.255	0.776	0.04	6.82	4.33	63.5	1.83	26.8	56	69	28.4	209.1	216.7	2.5	24.18
267	Female	55	2020-08-20	IgA-λ	2	2	1	standard risk	No	No	28	No	28	normal	normal	-	normal	normal	normal	No	-	+	-	-	-	7	1	13	＜3.5	9.23	6.82	0.204	0.804	0.456	7.12	4.64	65.2	1.73	24.3	104	322	43.5	175.1	51.2	2.34	0.47
268	Male	52	2019-10-23	IgA-λ	3	1	1	low-risk	No	No	38	No	38	abnormal	normal	-	normal	normal	normal	No	-	+	-	-	-	18.5	Multiple	51	≥3.5	2.68	22.9	0.098	0.448	0.159	5.76	1.28	22.2	4.07	70.7	72	130	33.8	78.4	72.4	2.38	0.92
269	Male	64	2018-07-02	IgA-λ	2	2	2	standard risk	No	No	53	No	53	normal	normal	-	normal	normal	deletion	No	-	-	-	-	-	0	0	20	≥3.5	21.2	25.6	0.688	0.952	0.259	6.83	3.8	55.2	2.5	36.3	107	378	35	106.8	83.4	2.49	1.9
270	Female	65	2017-03-16	IgG-k	3	3	2	standard risk	No	No	69	No	69	normal	normal	-	normal	normal	normal	No	-	+	-	-	-	18	Multiple	97.08	＜3.5	105	＜0.245	＜0.156	0.563	0.04	4.6	2.8	60.7	1	22.2	53	194	28.2	146.8	100.3	2.03	4.64
271	Female	64	2016-04-01	IgG-k	3	3	2	high-risk	No	Yes	69	Yes	69	normal	normal	-	normal	normal	normal	No	-	+	-	-	-	35.5	0	27.89	＜3.5	43.3	0.57	0.336	0.957	0.07	6.43	3.4	53.2	2.3	36.4	76	205	39.9	184.3	159.4	2.44	0.22
272	Male	52	2018-08-03	IgG-κ	2	3	2	standard risk	No	No	52	No	52	normal	normal	-	normal	normal	normal	No	-	+	-	-	-	28	0	44	≥3.5	54.7	0.484	0.198	1.03	0.075	6.5	3.88	59.7	1.94	29.8	98	304	28	81.5	95.9	2.55	15.23
273	Male	62	2019-11-19	IgG- λ	3	3	2	standard risk	Yes	No	37	No	37	normal	normal	-	normal	normal	normal	No	-	+	-	-	-	11	Multiple	56	＜3.5	66.7	0.164	0.115	0.762	0.13	3.62	2.07	53.4	1.38	35.7	70	106	28.8	102.9	117.4	1.97	0.48
274	Male	65	2019-04-29	IgG-κ	3	3	2	standard risk	No	No	44	No	44	normal	normal	-	normal	normal	normal	No	-	+	-	-	-	0	0	43	≥3.5	51.5	0.236	0.174	0.862	0.235	5.73	2.25	39.3	2.9	50.6	75	91	27.6	243.9	187.7	2.62	7.68
275	Female	55	2020-05-13	IgG- λ	3	3	3	standard risk	No	Yes	28	Yes	28	abnormal	normal	-	normal	normal	normal	No	-	+	-	-	-	19	Multiple	86	≥3.5	102	0.154	0.348	0.369	0.104	8.76	3.96	45.3	3.99	45.5	68	138	20.5	71.3	71.2	1.88	3.79
276	Male	72	2019-11-26	κ-light chain	3	3	2	standard risk	No	No	37	No	37	abnormal	normal	-	normal	normal	normal	No	-	+	-	-	-	17	Multiple	0	≥3.5	2.54	＜.067	＜.042	0.864	0.253	14.56	12.07	82.9	1.3	8.9	86	119	34.7	155.6	334.9	3.29	32.13
277	Male	57	2016-03-01	IgG-λ	3	3	2	standard risk	No	Yes	23	Yes	23	normal	normal	-	normal	normal	normal	No	-	+	-	-	-	13.5	1	39.24	≥3.5	52.6	0.509	0.217	1.22	0.066	7.59	4	53.2	2.7	35.8	118	313	29.1	153.6	81.5	2.17	16.74
278	Male	70	2014-09-24	IgG-λ	2	2	2	standard risk	No	Yes	33	No	99	normal	deletion	-	normal	normal	normal	No	-	-	-	-	-	4	＞2	19.27	≥3.5	34.9	0.564	0.922	1	0.082	9.3	6.3	67.2	1.7	18.1	111	318	37.1	253.3	103.6	2.3	5.23
279	Male	50	2018-04-30	IgA-λ	2	2	1	low-risk	No	Yes	2	No	56	normal	normal	-	normal	normal	normal	No	-	+	-	-	-	2	Multiple	28.76	≥3.5	30.1	1.71	0.292	1.36	0.071	7.92	5.6	71.2	1.3	16.9	127	400	34.6	249.2	74.6	2.2	87.62
280	Female	46	2018-05-10	IgG- λ	2	1	1	low-risk	No	No	55	No	55	normal	normal	-	normal	normal	normal	No	-	+	-	-	-	0	2	5.18	＜3.5	12.4	2.1	2.05	0.865	0.151	4.04	2.9	72.1	0.8	20	128	218	43.2	153.8	64.1	2.31	0.42
281	Male	55	2016-02-03	IgA-k	3	2	3	high-risk	No	No	6	Yes	6	abnormal	deletion	-	abnormal	normal	deletion	No	-	+	-	-	-	32.5	Multiple	67.92	＜3.5	2.28	67.7	＜0.156	0.68	0.413	7.95	4.1	51.4	2.7	34.1	63	58	25.2	76.2	387	3.43	0.65
282	Male	65	2019-03-12	IgA-κ	3	3	3	high-risk	No	No	45	No	45	abnormal	deletion	-	normal	normal	deletion	No	-	+	-	-	+	30.5	0	60	≥3.5	5.63	75.6	0.196	0.454	0.124	5.14	3.3	61	1.75	32.3	75	244	32	98.2	120	2.1	8.02
283	Male	58	2020-11-09	IgG-κ	1	1	2	standard risk	No	No	25	No	25	normal	normal	-	normal	normal	normal	No	-	+	-	-	+	0	Multiple	20	＜3.5	32.2	1.87	1.15	0.896	0.069	6.97	4.58	65.7	1.39	19.9	136	224	38.3	120	71.2	2.28	2.26
284	Female	34	2017-03-23	IgA-λ	2	1	2	standard risk	No	Yes	7	No	69	normal	normal	-	normal	normal	normal	No	-	+	-	-	-	0	Multiple	12.09	＜3.5	15.5	6.68	2.13	0.941	0.29	3.51	1.5	42.4	1.6	45.6	113	278	46.1	207.6	53.2	2.35	0.19
285	Female	69	2020-03-09	IgA-κ	3	3	3	standard risk	No	Yes	31	Yes	31	normal	normal	-	normal	normal	normal	No	-	+	-	-	-	65	0	83	＜3.5	2.71	91.6	0.084	0.512	0.183	5.91	2.38	40.3	3.21	54.3	71	58	25	120.4	230.8	2.84	1.18
286	Male	60	2018-08-10	IgA-κ	1	3	2	standard risk	No	Yes	17	Yes	17	normal	normal	-	normal	normal	normal	No	-	-	-	-	-	3	Multiple	7	≥3.5	8.32	11.2	0.428	1.35	0.181	6.36	4.42	69.4	1.41	22.2	132	251	42.5	188.9	92.8	2.43	5.38
287	Male	57	2016-11-14	κ-light chain	3	3	2	standard risk	No	No	73	No	73	normal	normal	-	normal	normal	normal	No	-	-	-	-	-	22	Multiple	17.39	≥3.5	2.65	0.25	＜0.156	0.773	0.205	4.09	2.3	27.2	1.1	25.7	63	85	34.3	207.8	694.7	2.41	7.4
288	Male	38	2020-08-22	κ-light chain	3	3	3	standard risk	Yes	No	28	No	28	normal	deletion	-	normal	normal	deletion	No	-	-	-	-	-	76.5	Multiple	4	≥3.5	5.46	0.136	0.131	0.956	0.347	3.07	1.77	57.6	0.94	30.6	70	120	41.5	214	391	1.86	9.06
289	Male	55	2016-01-28	IgG-k	3	3	2	standard risk	No	No	6	Yes	6	normal	normal	-	normal	normal	normal	No	-	+	-	-	-	5	Multiple	62.72	≥3.5	80	＜0.245	＜0.156	1.05	0.033	7.44	6.6	89	0.5	6.2	111	266	23.8	91.8	48.1	2.32	81.31
290	Male	59	2017-01-06	IgG-k	3	2	2	standard risk	No	Yes	26	No	71	normal	normal	-	normal	normal	normal	No	-	+	-	-	-	8	1	52.23	＜3.5	64.2	＜0.245	＜0.156	0.68	0.156	4.28	2.2	51.2	1.8	41.6	97	232	31.7	214.6	85.3	2.06	2.18
291	Female	44	2018-04-09	IgA-λ	3	2	2	standard risk	No	Yes	51	No	56	abnormal	normal	-	normal	normal	normal	No	-	+	-	-	+	57	0	49.72	＜3.5	2.85	62.4	0.266	0.993	0.219	4.05	2.3	57.6	1.3	32.1	78	154	32.6	99	63.3	2.3	1.69
292	Female	68	2016-05-25	λ-light chain	3	2	3	standard risk	No	No	79	No	79	normal	normal	-	normal	normal	normal	No	-	+	-	-	-	52.5	Multiple	0	≥3.5	8.76	0.562	0.365	1.22	0.601	3.92	1.8	46.4	1.7	42.1	123	226	45.2	613	34.2	2.34	4.58
293	Female	48	2016-11-15	IgG-k	3	3	2	standard risk	No	Yes	21	No	73	abnormal	Trisomy	-	normal	normal	abnormal	No	-	-	-	-	-	0	Multiple	85.12	≥3.5	101	＜0.245	＜0.156	0.749	0.202	4.22	2.2	51.9	1.6	38.4	68	201	24.4	138.2	54.4	2.03	1.03
294	Female	63	2016-02-01	IgA-k	1	1	1	low-risk	No	No	82	No	82	normal	normal	-	normal	normal	normal	No	-	+	-	-	+	18	0	6.48	≥3.5	4.48	14.6	0.248	1.32	0.301	3.51	2.2	62.9	0.5	14.5	116	287	40	199.4	53.6	2.12	2.54
295	Male	46	2020-04-03	IgG-κ	1	3	2	low-risk	Yes	No	32	No	32	normal	normal	-	normal	normal	normal	No	-	+	-	-	-	7.5	Multiple	32	＜3.5	62.2	1.93	0.608	1.65	0.162	7.27	4.88	67.1	1.78	25.5	148	258	39.3	190.4	118.2	2.42	3.2
296	Male	52	2018-03-06	IgG-κ	1	1	1	low-risk	Yes	No	57	No	57	normal	normal	-	normal	normal	normal	No	-	+	-	-	+	9.6	Multiple	12.5	＜3.5	25.4	1.03	0.686	1.5	0.921	6.95	4.8	69.6	1.6	22.7	110	328	40	166.3	67.5	2.07	36.38
297	Female	46	2016-05-01	IgG-λ	2	1	1	low-risk	No	Yes	28	No	79	normal	normal	-	normal	normal	normal	No	-	+	-	-	-	35	0	2.18	≥3.5	27.2	0.344	0.218	1.08	0.498	4.92	3.1	62.8	1.3	25.4	89	39	40.7	144	41	2.16	0.41
298	Female	69	2015-04-22	IgG-k	3	3	3	high-risk	No	Yes	17	Yes	17	abnormal	deletion	-	normal	normal	deletion	No	-	-	-	-	-	0	0	54.41	≥3.5	61.8	＜0.245	＜0.156	0.697	0.036	4.17	2.5	58.8	1.4	32.2	61	151	31.2	309.5	55	2.08	1.01
299	Female	68	2015-03-25	IgG-k	3	3	2	standard risk	No	No	1	Yes	1	normal	normal	-	normal	normal	normal	No	-	+	-	-	+	3.5	0	4.9	≥3.5	8.21	1.13	0.404	1.39	0.022	5.67	3.4	60.6	1.5	26.5	70	349	35.5	184	393.1	2.28	33.76
300	Male	57	2019-05-10	IgG-κ	2	3	2	standard risk	No	No	41	Yes	41	normal	normal	-	normal	normal	normal	No	-	-	-	-	-	19.5	Multiple	29	＜3.5	32.9	0.175	0.093	1.32	0.06	5.12	2.35	46	2.06	40.2	91	332	31.1	211.5	126.4	2.01	2.21
301	Male	49	2016-10-10	κ-light chain	3	1	1	low-risk	No	No	74	No	74	normal	normal	-	normal	normal	normal	No	-	+	-	-	-	0	Multiple	0	≥3.5	14	2.82	0.278	1.22	0.242	9.17	5.4	58.8	2.5	27.6	143	250	41.6	126.7	103.7	2.41	60.84
302	Female	66	2015-04-29	IgG-λ	2	3	3	standard risk	No	No	92	No	92	normal	normal	-	normal	normal	normal	No	-	+	-	-	+	8.5	0	23.86	＜3.5	28.1	0.294	0.307	1.15	0.336	6.86	4.3	63.2	1.7	24.1	101	217	38.9	357.6	46.9	2.15	37.34
303	Male	63	2016-04-04	IgG-λ	3	3	2	standard risk	No	No	80	No	80	normal	normal	-	normal	normal	normal	No	-	-	-	-	-	2.5	Multiple	48.45	≥3.5	60.08	＜0.245	＜0.156	0.876	0.016	7.01	4	57.4	2.1	30	73	244	35.5	154.7	140.5	2.36	0.43
304	Female	59	2019-02-01	IgA-κ	3	2	2	standard risk	No	Yes	15	No	46	normal	normal	-	normal	normal	normal	No	-	+	-	-	-	20.5	Multiple	44	≥3.5	2.71	57.2	0.172	0.674	0.41	7.28	2.2	30.2	3.78	51.9	58	89	34.8	126.2	50.2	2.27	0.86
305	Female	52	2017-12-08	κ-light chain型	1	2	1	low-risk	No	No	60	No	60	normal	normal	-	normal	normal	normal	No	-	+	-	-	-	18	Multiple	0	＜3.5	8.15	0.337	0.348	1.12	0.339	8.31	5.3	63.8	2.5	29.6	141	334	53.7	191.4	75.2	2.47	0.65
306	Female	43	2018-12-18	IgG- λ	3	3	3	high-risk	No	No	48	No	48	normal	normal	-	normal	normal	normal	No	-	-	-	-	-	25	Multiple	60	≥3.5	98.7	0.7	0.206	0.581	0.302	4.43	3.14	70.9	1.01	22.8	51	216	30.9	359.4	121.9	2.37	32.48
307	Male	69	2018-11-14	IgG-κ	1	2	2	standard risk	No	Yes	37	Yes	37	normal	normal	-	normal	normal	normal	No	-	+	-	-	-	22	Multiple	46	≥3.5	75.7	2.36	0.492	0.942	0.064	6.89	4.85	70.4	1.36	19.7	122	257	33.4	137.3	84.3	2.05	2.59
308	Male	56	2016-05-23	IgA-k	3	3	2	standard risk	Yes	No	79	No	79	normal	normal	-	normal	normal	normal	No	-	+	-	-	-	21	0	66.7	≥3.5	1.72	85.8	＜0.156	0.583	0.097	4.12	2	47.3	1.8	44.4	65	73	33.4	55.5	93	2.3	0.42
309	Male	50	2015-03-26	IgA-λ	3	3	2	standard risk	Yes	Yes	26	No	93	normal	normal	-	normal	normal	normal	No	-	+	-	-	-	15.5	Multiple	15.9	≥3.5	9.04	22.4	0.384	1.06	0.258	6.38	4.2	65.9	1.7	26.5	135	196	39.9	179.6	94.9	2.52	8.08
310	Male	73	2019-01-17	IgG- λ	2	2	2	standard risk	No	Yes	15	No	47	abnormal	normal	+	normal	normal	normal	No	-	+	-	-	-	46	Multiple	18	＜3.5	26	0.167	0.137	0.798	0.191	9.89	6.92	69.9	2.29	23.2	105	200	28.3	279.7	106.2	2.39	34.13
311	Male	77	2019-11-11	IgA-λ	3	3	2	standard risk	No	No	37	No	37	normal	deletion	-	normal	normal	normal	No	-	-	-	-	-	20	Multiple	20	≥3.5	5.71	38.2	0.113	0.894	0.444	3.22	1.73	53.4	1.19	36.7	73	208	35.1	113.9	104.9	2.1	5.55
312	Female	66	2016-11-07	λ-light chain	3	1	2	standard risk	No	No	73	No	73	normal	normal	-	normal	normal	normal	No	-	+	-	-	+	25	Multiple	0	≥3.5	9.59	0.655	0.233	1.03	0.358	6.2	4.6	73.4	1	16.4	161	216	40.6	189.8	47.6	2	7.95
313	Female	54	2016-09-27	IgM-λ	2	2	2	standard risk	No	Yes	1	No	75	normal	normal	-	normal	normal	normal	No	-	+	-	-	-	29.8	0	3.4	≥3.5	6.27	＜0.245	0.319	0.877	0.264	2.4	1.2	47.8	0.9	36.3	87	126	65.32	167.4	82.3	2.24	0.1
314	Female	63	2015-07-20	κ-light chain	3	3	2	standard risk	No	Yes	20	Yes	20	normal	deletion	-	normal	normal	deletion	No	-	-	-	-	-	65.5	0	41.71	≥3.5	1.82	＜0.245	＜0.156	0.485	0.158	4.53	1.9	42.9	1.9	40.8	67	64	24.5	106	193.6	2.73	7.07
315	Male	53	2015-06-03	IgA	1	1	1	low-risk	No	Yes	16	Yes	16	normal	normal	-	normal	normal	normal	No	-	+	-	-	-	4.5	Multiple	0	≥3.5	8.56	1.13	0.905	1.04	0.202	3.57	2.5	71.1	0.6	17.4	113	145	40.1	173.1	62.2	2	0.3
316	Male	76	2016-06-21	IgA-k	3	2	2	standard risk	No	No	78	No	78	abnormal	Trisomy	-	normal	normal	abnormal	No	-	+	-	-	-	45	Multiple	56.75	＜3.5	2.12	55.1	＜0.156	0.269	0.162	9.15	5.3	58	1.3	14.6	79	103	24.9	80.8	113.3	2.34	45.57
317	Female	62	2017-11-20	IgG-κ	2	1	2	standard risk	No	No	57	Yes	57	normal	normal	-	normal	normal	normal	No	-	-	-	-	-	5.27	Multiple	34.56	≥3.5	42.8	1.84	0.253	1.19	0.12	7.31	4.9	67.1	2	27.5	114	289	36.4	128.4	34.4	2.33	0.71
318	Male	65	2020-11-20	λ-light chain	1	1	2	standard risk	No	No	25	No	25	normal	normal	-	normal	normal	normal	No	-	+	-	-	-	0	Multiple	4.5	≥3.5	6.75	0.723	0.259	0.89	0.202	7.5	4	53.8	2.5	33.3	164	238	39.7	123.5	72.8	2.29	0.41
319	Male	63	2019-03-28	IgA- L	2	2	2	standard risk	No	Yes	27	No	45	normal	normal	-	normal	normal	normal	No	-	-	-	-	-	52	Multiple	74	≥3.5	4.29	78.2	0.171	0.438	0.166	5.71	1.71	29.9	3.39	59.4	97	198	26.9	82.4	75.4	2.48	1.48
320	Female	34	2018-08-23	IgG-κ	3	2	2	low-risk	Yes	No	52	No	52	normal	deletion	-	normal	normal	deletion	No	-	+	-	-	-	37	Multiple	32	＜3.5	40.7	＜0.245	＜0.156	0.942	0.021	4.83	2.1	43.5	2.36	48.9	95	161	45.1	200.5	62.2	2.8	0.05
321	Male	63	2019-06-28	IgG-κ	2	3	2	standard risk	No	No	39	Yes	39	normal	normal	-	normal	normal	normal	No	-	-	-	-	-	5	Multiple	45	＜3.5	63.5	0.402	0.927	0.858	0.112	5.68	3.71	65.3	1.58	27.8	114	132	35.4	258.2	95.7	2.12	0.61
322	Male	27	2018-07-17	IgG-κ	1	3	3	high-risk	Yes	No	53	No	53	normal	deletion	-	normal	normal	deletion	No	-	-	-	-	-	15.5	0	70	＜3.5	97.8	＜0.245	0.194	1.36	0.02	11.57	2.75	40.8	6.2	51.6	68	82	36.1	479.4	110.1	2.22	0.21
323	Male	68	2018-11-06	IgG- λ	2	3	2	standard risk	No	No	49	No	49	abnormal	normal	-	normal	normal	normal	No	-	+	-	-	-	25.5	0	67	≥3.5	97.3	0.445	0.191	0.943	0.218	5.96	2.56	42.9	2.85	47.6	103	146	28.7	116.2	93.3	2.19	2.45
324	Female	63	2018-06-05	λ-light chain	3	1	1	standard risk	No	No	54	No	54	normal	normal	-	normal	normal	normal	No	-	-	-	-	-	5	Multiple	0	≥3.5	6.84	0.943	＜0.156	1.35	0.311	9.11	5.8	63.2	2	21.6	123	256	43.6	187.4	42.6	2.39	0.45
325	Male	50	2020-11-27	IgG-κ	1	2	2	low-risk	No	No	5	Yes	5	normal	normal	-	normal	normal	normal	No	-	-	-	-	-	8	Multiple	22	≥3.5	27.6	0.469	0.692	0.912	0.138	5.37	2.64	49.1	2.26	42.1	150	204	37.3	135.6	83.6	2.04	4.01
326	Male	62	2020-07-14	IgG-κ	3	3	2	standard risk	No	No	29	No	29	normal	normal	-	normal	normal	normal	No	-	-	-	-	-	25.5	Multiple	5	＜3.5	9.47	0.152	0.105	0.509	0.346	2.42	1.68	69.4	0.51	21.1	67	144	39.2	144	80.9	2.19	1.22
327	Female	52	2019-12-20	κ-light chain	2	1	1	low-risk	No	Yes	4	Yes	4	normal	normal	-	normal	normal	normal	No	-	+	-	-	-	28	Multiple	0	＜3.5	2.97	0.184	0.127	0.861	0.203	5.11	3.47	67.9	1.29	25.2	117	188	42.9	156.1	50.2	2.24	0.28
328	Male	56	2019-10-10	IgA-λ	1	1	1	low-risk	Yes	No	38	No	38	normal	normal	-	normal	normal	normal	No	-	+	-	-	-	0	Multiple	12	≥3.5	5.28	0.264	0.488	0.849	0.258	5.46	2.46	49.2	2	40	128	184	40.7	136.8	51.2	2.24	1.17
329	Male	41	2019-03-28	IgG-κ	3	2	1	low-risk	Yes	No	45	No	45	normal	normal	-	normal	normal	normal	No	-	-	-	-	-	12	Multiple	26	＜3.5	39.4	0.24	0.199	0.926	0.06	4.92	3.83	77.9	0.69	14	154	178	35.9	204.8	106.8	2.08	106.8
330	Male	42	2019-08-29	IgG-κ	1	2	3	standard risk	No	No	37	Yes	37	normal	normal	-	normal	normal	normal	No	-	+	-	-	-	3	0	9	＜3.5	11.9	0.31	0.222	0.383	0.101	6.82	4.54	66.6	1.48	21.7	148	501	29.4	192	72	2.1	0.72
331	Female	68	2019-06-26	IgG-κ	3	2	2	standard risk	No	Yes	20	No	42	normal	normal	-	normal	normal	normal	No	-	-	-	-	-	10.5	Multiple	4	＜3.5	8.94	0.517	0.34	0.792	0.173	3.48	1.63	46.9	1.57	45.1	74	105	33	221.9	52.4	2.09	11.58
332	Male	61	2018-06-08	IgA-λ	3	3	2	standard risk	No	Yes	44	Yes	44	abnormal	normal	-	normal	normal	normal	No	-	-	-	-	-	17	1	50	≥3.5	1.54	61.2	＜0.156	0.48	0.114	4.12	2.6	63.4	1.1	26.7	75	119	32.1	89.2	66.4	2.19	0.7
333	Female	53	2019-08-19	IgG- λ	3	3	2	standard risk	Yes	No	40	No	40	normal	normal	-	normal	normal	normal	No	-	+	-	-	-	37.5	0	57	≥3.5	74	0.267	0.193	0.898	0.038	9.93	6.15	62	3.11	31.3	72	293	34.8	132.3	72.5	2.2	1.65
334	Female	59	2017-11-27	IgG- λ	3	2	2	standard risk	Yes	No	61	No	61	normal	normal	-	normal	normal	normal	No	-	-	-	-	-	0	Multiple	44.65	≥3.5	62	＜0.245	＜0.156	1	0.047	4.58	2.2	48.6	2.1	45.9	119	207	34.8	136.2	48.5	2.25	1.16
335	Female	55	2019-10-09	IgG- λ	2	2	2	standard risk	Yes	Yes	26	No	38	abnormal	deletion	-	normal	normal	deletion	No	-	-	-	-	-	18	Multiple	38	≥3.5	34.2	0.376	0.413	1.5	0.419	5.56	2.74	49.2	2.49	44.8	99	250	38.2	218.3	56.2	2.6	19.25
336	Female	74	2020-03-05	IgG- λ	2	2	1	low-risk	Yes	No	33	No	33	normal	normal	-	normal	normal	normal	No	-	-	-	-	-	11	0	57	≥3.5	34.8	0.342	0.111	1.25	0.205	8.31	4.85	58.3	2.65	31.9	87	324	26.1	113.4	37.7	2.06	1.73
337	Male	50	2017-10-26	IgG- λ	3	1	1	low-risk	Yes	Yes	20	No	62	normal	normal	-	normal	normal	normal	No	-	+	-	-	-	0	Multiple	23.26	＜3.5	32.2	0.568	0.406	1.38	0.062	4.89	2	41.7	2.4	49.9	130	161	44.7	154.7	89.5	2.3	1.17
338	Female	45	2018-04-30	IgG- λ	3	2	1	low-risk	Yes	No	56	No	56	normal	normal	-	normal	normal	normal	No	-	+	-	-	-	26.5	0	29.17	≥3.5	33.1	＜0.245	＜0.156	1.14	0.388	3.36	1.5	45.6	1.6	47.3	49	79	32.6	185.3	51.6	1.85	9.32
339	Female	57	2020-10-27	IgG-κ	3	2	2	standard risk	No	No	26	No	26	normal	normal	-	normal	normal	normal	No	-	-	-	-	-	8.5	Multiple	69	≥3.5	87.7	0.108	0.203	0.626	0.037	5.2	3.18	61.1	1.59	30.6	78	173	25	109	45.3	1.96	0.07
340	Male	69	2019-03-15	IgA-κ	3	2	2	standard risk	No	No	45	No	45	normal	normal	-	normal	normal	normal	No	-	+	-	-	+	5.1	Multiple	64	≥3.5	3.03	96.7	0.181	0.435	0.198	4.47	2.52	56.4	1.66	37	64	120	31	100.4	83.2	2.12	1.01
341	Female	51	2015-11-12	IgG-k	1	1	1	low-risk	No	No	85	No	85	normal	normal	-	normal	normal	normal	No	-	+	-	-	+	0	Multiple	10.3	≥3.5	18.4	3.06	1.52	1.07	0.222	3.87	1.8	46.3	1.6	40.8	132	219	43	144.4	63.1	2.33	0.95
342	Female	57	2017-10-24	λ-light chain	1	1	2	standard risk	No	No	62	No	62	normal	normal	-	normal	normal	normal	No	-	+	-	-	-	0	Multiple	3.28	≥3.5	11.6	2.24	1.1	1.37	0.423	6.66	3.8	56.4	2.3	34.1	119	245	43.8	144.1	49.9	2.56	6.59
343	Male	57	2018-07-23	Nonsecretory type	2	2	1	standard risk	No	No	53	No	53	normal	normal	-	normal	normal	normal	No	-	-	-	-	-	2.5	0	59	≥3.5	65.9	＜0.245	＜0.156	0.603	0.069	4.31	2.54	58.9	1.46	33.9	100	223	28.7	85.3	130.8	2.08	0.55
344	Female	47	2019-08-13	κ-light chain	3	2	1	low-risk	No	No	40	No	40	normal	normal	-	normal	normal	normal	No	-	+	-	-	-	5.5	Multiple	11	≥3.5	8.27	1.14	0.592	1.3	0.409	7.92	4.91	61.9	2.02	25.5	124	510	39.8	206	50.6	2.55	5.33
345	Female	64	2018-06-06	IgG- λ	3	3	2	standard risk	No	No	45	Yes	45	normal	normal	-	normal	normal	normal	No	-	-	-	-	-	65	Multiple	99	≥3.5	111	＜0.245	＜0.156	1.03	0.047	7.03	3.3	47.4	3	43.2	63	343	15.9	76.6	72.9	2.14	27.17
346	Male	53	2020-01-02	IgG-κ	3	2	2	standard risk	No	Yes	32	No	35	abnormal	normal	-	normal	normal	normal	No	-	+	-	-	-	10	Multiple	56	≥3.5	74.9	0.606	0.335	0.737	0.042	8.67	5.2	59.9	1.8	20.8	128	385	29.8	94.2	78	2.21	0.48
347	Male	67	2014-08-27	IgG-k	2	1	1	standard risk	Yes	No	100	No	100	abnormal	normal	-	normal	normal	deletion	No	-	+	-	-	-	11	1	23.12	＜3.5	47.1	0.603	0.678	1.18	0.276	74	3.8	53.5	2.6	35.8	122	288	38.2	121.2	111.1	2.58	0.85
348	Female	63	2019-09-25	Nonsecretory type	2	3	2	standard risk	No	No	39	No	39	normal	normal	-	normal	normal	normal	No	-	+	-	-	-	42.5	Multiple	50	≥3.5	5.58	56.3	0.216	0.781	0.235	3.91	1.89	48.3	1.7	43.5	97	305	37.5	124.1	54.4	2.5	1.96
349	Female	53	2020-12-04	λ-light chain	1	1	1	low-risk	No	No	24	No	24	normal	normal	-	normal	normal	normal	No	-	+	-	-	-	19.5	Multiple	5	＜3.5	5.56	0.307	0.122	1.16	0.415	8.92	5.84	65.5	2.5	28	107	329	49	163.9	59.5	2.51	1.74
350	Female	47	2020-08-10	λ-light chain	3	2	2	low-risk	Yes	No	28	No	28	abnormal	normal	-	normal	normal	normal	No	-	-	-	-	-	23	Multiple	2	≥3.5	6.45	0.42	0.247	1.03	0.354	5.38	3.22	59.9	1.69	31.4	128	504	39.7	333.3	66.3	2.82	4.2
351	Male	59	2020-07-02	IgG- λ	3	2	2	standard risk	Yes	No	29	No	29	normal	normal	-	normal	normal	normal	No	-	+	-	-	-	1	0	32	＜3.5	57.3	0.143	0.176	0.685	0.023	4.25	2.19	51.5	1.65	38.8	115	132	34.9	120	93.9	2.31	0.62
352	Male	63	2020-09-04	IgA-λ	3	3	2	standard risk	No	No	27	No	27	normal	normal	-	normal	normal	normal	No	-	-	-	-	-	21	Multiple	20	≥3.5	6.11	19.5	0.123	1.01	0.285	5.42	3.58	66	1.35	24.9	86	228	45.4	204.3	55.7	2.39	2.68
353	Male	69	2017-11-27	IgG- λ	2	2	3	high-risk	No	Yes	9	No	61	normal	deletion	-	normal	normal	normal	No	-	-	-	-	-	25	Multiple	47.67	＜3.5	63.8	＜0.245	0.328	1.56	0.157	4.85	1.5	31.1	2.9	60	93	63	27.6	238	98.5	2.26	148.01
354	Female	75	2020-07-24	IgA-λ	3	3	2	standard risk	No	Yes	8	No	29	normal	normal	-	normal	normal	normal	No	-	+	-	-	-	3	Multiple	49	≥3.5	5.28	0.264	0.488	0.849	0.258	5.46	2.25	56	1.34	33.4	77	214	31.5	120	58.3	2.36	0.49
355	Male	77	2019-01-08	IgG-κ	3	3	2	standard risk	No	Yes	9	No	47	normal	normal	-	normal	normal	normal	No	-	-	-	-	-	0	Multiple	34	≥3.5	41.6	0.137	0.138	0.783	0.207	4.75	2.65	55.8	1.06	22.3	93	194	28.7	150.2	92.3	2	8.76
